# Supplementary material for: Synthesis and biological activity, and molecular modelling studies of potent cytotoxic podophyllotoxin-naphthoquinone compounds
Source: Royal Society of Chemistry journal article supplement (doi:10.1039/d2ra03312g), 2022-01-01

**Synthesis and biological activity, and molecular modelling studies of potent cytotoxic podophyllotoxin–naphthoquinone compounds**

Ha Thanh Nguyen <sup>a,b\*</sup>, Quynh Giang Nguyen Thi <sup>a,b</sup>, Thu Ha Nguyen Thi <sup>a,b</sup>, Phuong Hoang Thi <sup>b</sup>, Giang Le-Nhat-Thuy <sup>a,b</sup>, Tuyet Anh Dang Thi <sup>a,b</sup>, Bao Le-Quang <sup>c</sup>, Hai Pham-The <sup>c</sup>, Tuyen Van Nguyen <sup>a,b,\*\*</sup>

<sup>a</sup>Graduate University of Science and Technology, VAST, 18 Hoang Quoc Viet, Cau Giay, Hanoi, Vietnam

<sup>b</sup>Institute of Chemistry, Vietnam Academy of Science and Technology (VAST), 18 Hoang Quoc Viet, Cau Giay, Hanoi, Vietnam

<sup>c</sup>Hanoi University of Pharmacy, 13-15 Le Thanh Tong, Hoan Kiem, Hanoi, Vietnam

\* Corresponding Authors:

*Prof.* Tuyen Van Nguyen

E-mail: [ngvtuyen@hotmail.com](mailto:ngvtuyen@hotmail.com), [ngvtuyen@ich.vast.vn](mailto:ngvtuyen@ich.vast.vn) (T. V. Nguyen)

*Dr.* Ha Thanh Nguyen

E-mail: [hathanhnguyen1512@gmail.com](mailto:hathanhnguyen1512@gmail.com) (H. T. Nguyen)

## Contents

|                                                                                                             |    |
|-------------------------------------------------------------------------------------------------------------|----|
| 11-(3-Methoxyphenyl)-4,11-dihydrobenzo[g]furo[3,4-b]quinoline-1,5,10(3H)-trione ( <b>5a</b> ).....          | 3  |
| 11-(3-Nitrophenyl)-4,11-dihydrobenzo[g]furo[3,4-b]quinoline-1,5,10(3H) -trione ( <b>5b</b> ) .....          | 4  |
| 11-(3-Bromophenyl)-4,11-dihydrobenzo[g]furo[3,4-b]quinoline-1,5,10(3H) -trione ( <b>5c</b> ). .....         | 5  |
| 11-(Phenyl)-4,11-dihydrobenzo[g]furo[3,4-b]quinoline-1,5,10(3H) -trione ( <b>5d</b> ).....                  | 6  |
| 11-(2-Hydroxyphenyl)-4,11-dihydrobenzo[g]furo[3,4-b]quinoline-1,5,10(3H)-trione ( <b>5h</b> ).....          | 7  |
| 11-(4-Hydroxyphenyl)-4,11-dihydrobenzo[g]furo[3,4-b]quinoline-1,5,10(3H)-trione ( <b>5i</b> ).....          | 9  |
| 11-(4-Nitrophenyl)-4,11-dihydrobenzo[g]furo[3,4-b]quinoline-1,5,10(3H)-trione ( <b>5j</b> ). .....          | 12 |
| 4-(1,5,10-Trioxo-1,3,4,5,10,11-hexahydrobenzo[g]furo[3,4-b]quinolin-11-yl)benzotrile ( <b>5k</b> ). .....   | 15 |
| 11-(3,4-Dimethoxyphenyl)-4,11-dihydrobenzo[g]furo[3,4-b]quinoline-1,5,10(3H)-trione ( <b>5l</b> ). .....    | 17 |
| 11-(3,4,5-Trimethoxyphenyl)-4,11-dihydrobenzo[g]furo[3,4-b]quinoline-1,5,10(3H)-trione ( <b>5m</b> ). ..... | 19 |
| 11-(Pyridin-3-yl)-4,11-dihydrobenzo[g]furo[3,4-b]quinoline-1,5,10(3H)-trione ( <b>5n</b> ). .....           | 21 |
| 11-(5-Bromopyridin-2-yl)-4,11-dihydrobenzo[g]furo[3,4-b]quinoline-1,5,10(3H)-trione ( <b>5o</b> ). .....    | 24 |

# 11-(3-Methoxyphenyl)-4,11-dihydrobenzo[g]furo[3,4-b]quinoline-1,5,10(3H)-trione (5a)

HP245.29-DMSO-1H

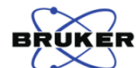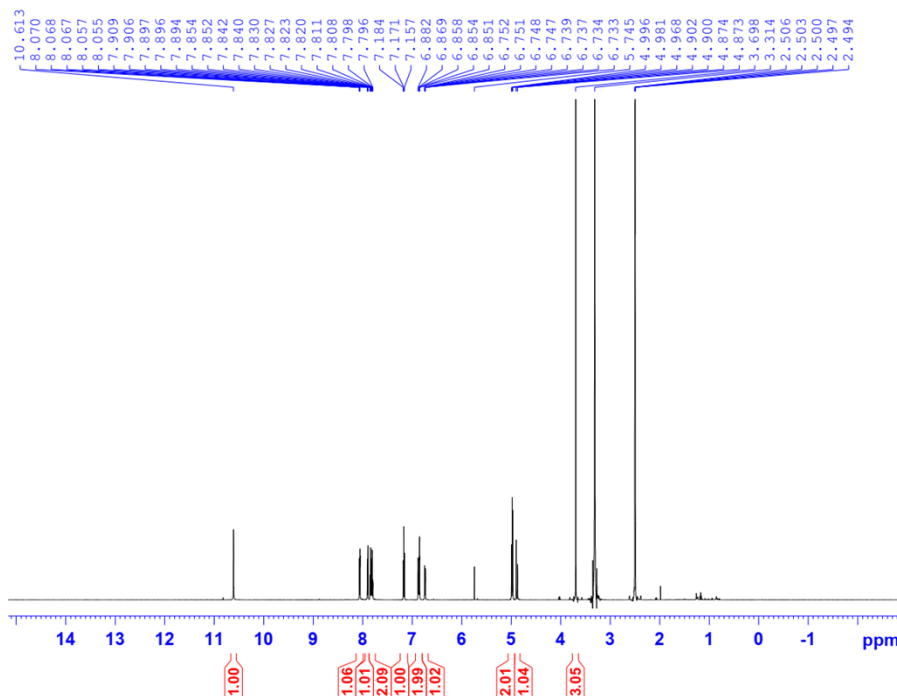

Current Data Parameters  
 NAME: GHP245.29  
 EXPNO: 10  
 PROCNO: 1

F2 - Acquisition Parameters  
 Date\_: 20220419  
 Time: 10.38 h  
 INSTRUM: AvanceNeo 600MHz  
 PROBHD: Z814601\_0129 ( )  
 PULPROG: zg30  
 TD: 65536  
 SOLVENT: DMSO  
 NS: 16  
 DS: 2  
 SWH: 11904.762 Hz  
 FIDRES: 0.368304 Hz  
 AQ: 2.7525120 sec  
 RG: 101  
 DW: 42.000 usec  
 DE: 9.08 usec  
 TE: 303.2 K  
 D1: 1.00000000 sec  
 TDO: 1  
 SFO1: 600.4037075 MHz  
 NUC1: 1H  
 P0: 2.77 usec  
 F1: 8.30 usec  
 PLW1: 13.36600018 W

F2 - Processing parameters  
 SI: 65536  
 SF: 600.4000046 MHz  
 WDW: EM  
 SSB: 0  
 LB: 0.30 Hz  
 GB: 0  
 PC: 1.00

HP245.29-DMSO-1H

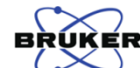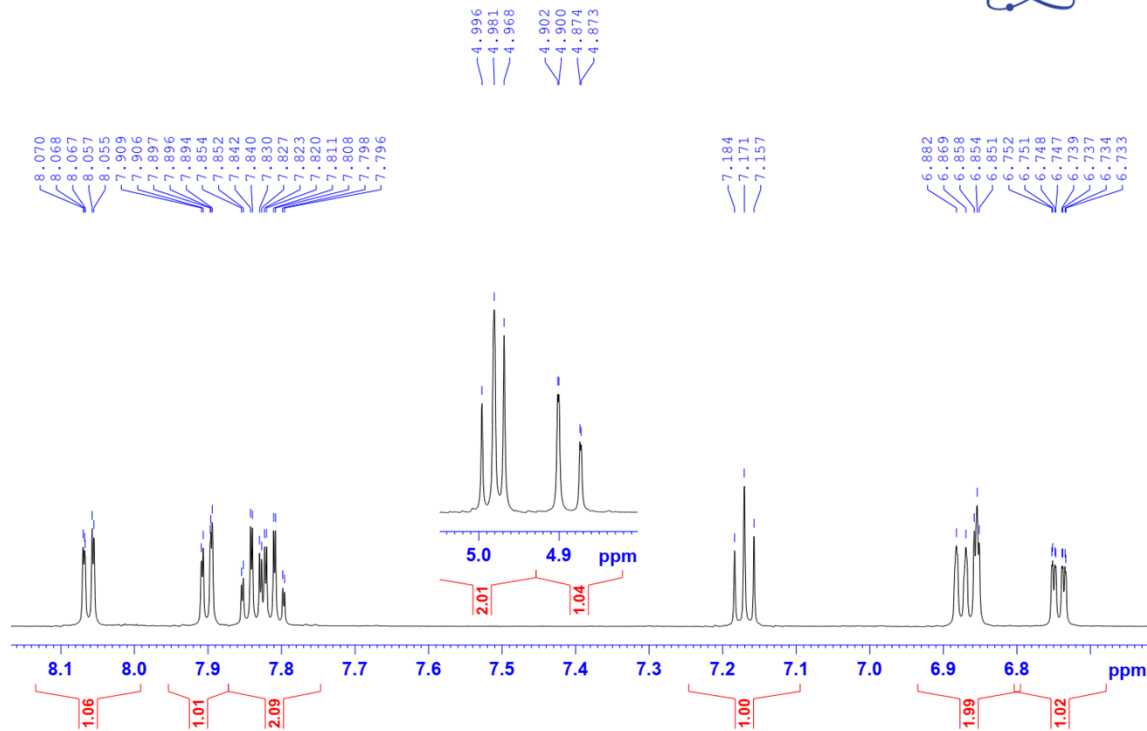

# 11-(3-Nitrophenyl)-4,11-dihydrobenzo[g]furo[3,4-b]quinoline-1,5,10(3H)-trione (5b)

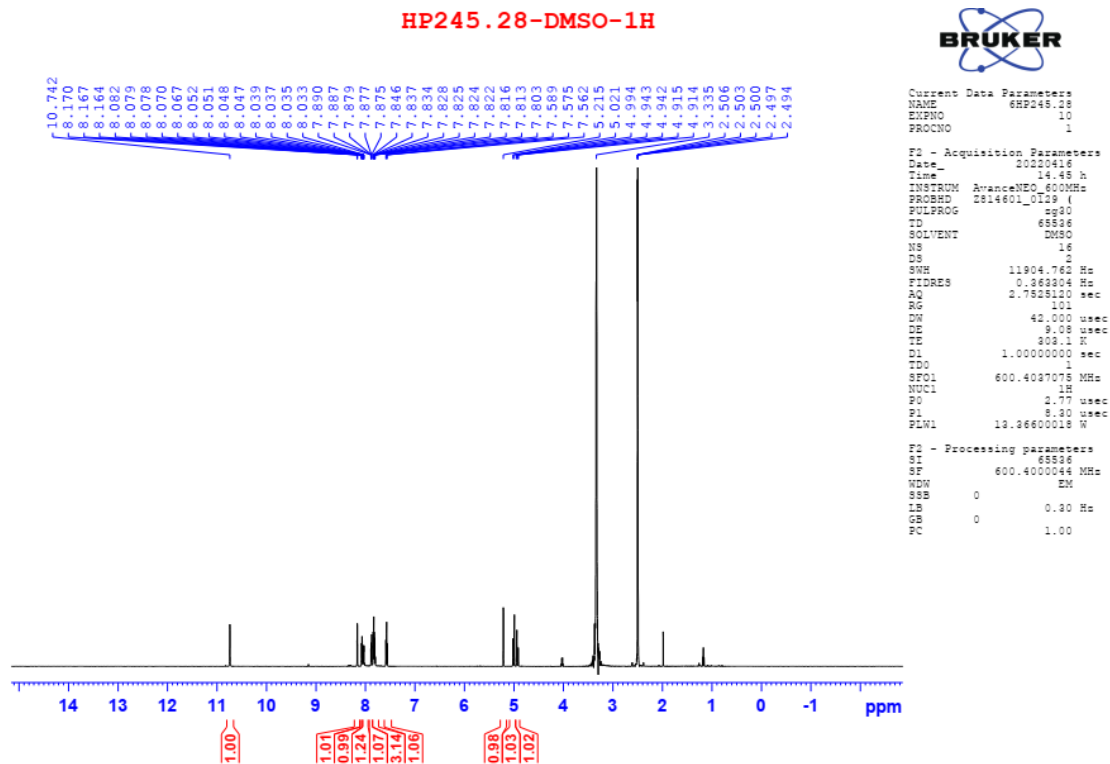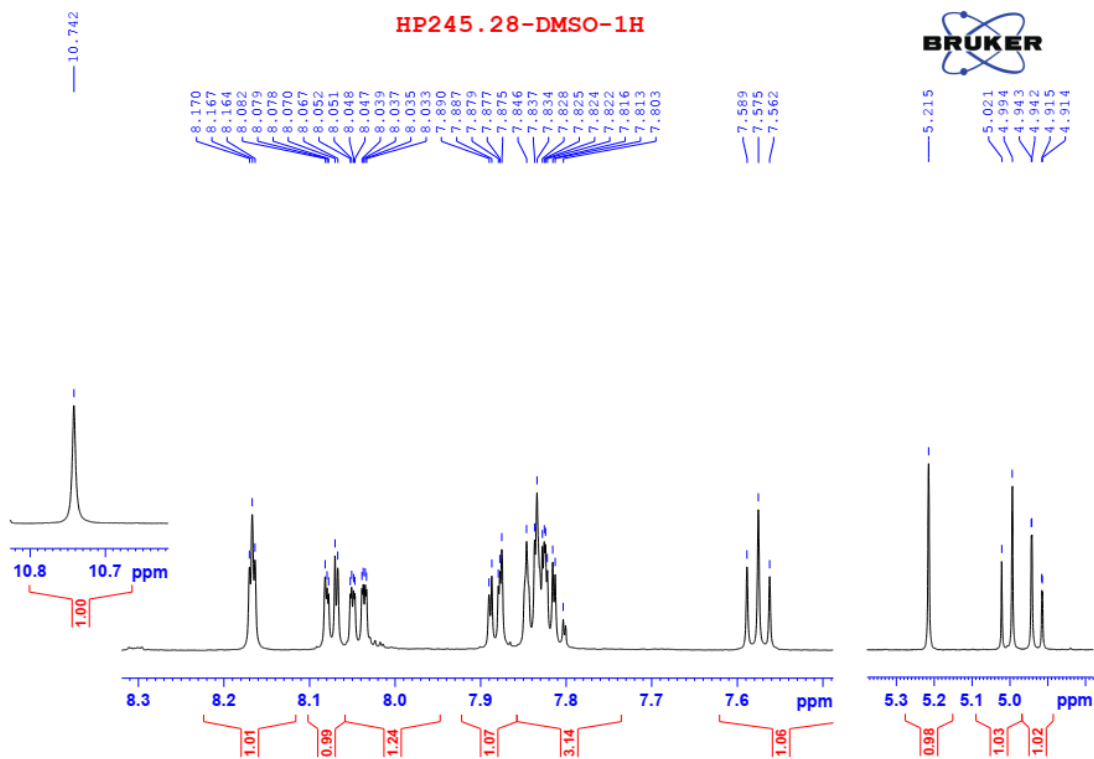

# 11-(3-Bromophenyl)-4,11-dihydrobenzo[g]furo[3,4-b]quinoline-1,5,10(3H) -trione (5c).

HP245.14.01-DMSO-1H

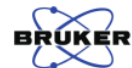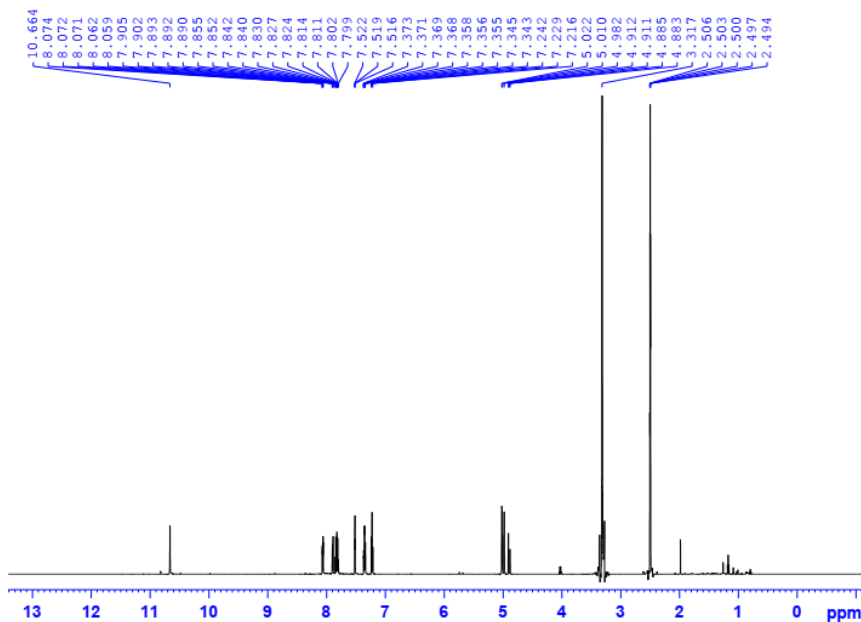

```

Current Data Parameters
NAME      HP245.14.01
EXPNO    10
PROCNO   1

F2 - Acquisition Parameters
Date_    20230419
Time     10.54 h
INSTRUM  Avance NEO 600MHz
PROBHD   zgpg30
PULPROG  zgpg30
TD        65536
SOLVENT  DMSO
NS       16
DS       4
SWH       11904.760 Hz
FIDRES    0.268204 Hz
AQ         2.7525110 sec
RG         101
DM         42.0000 usec
DE         9.08 usec
TE        303.2 K
D1         1.00000000 sec
DELTA     0.00000000 sec
H1        600.4037071 MHz
NUC1      1H
P1         2.77 usec
PL1       0.00 usec
NUC2      13C
P2         12.26600018 sec
PL2       0.00 usec

Processing parameters
SI        32768
SF        600.4000046 MHz
WDW        EM
SSB        0
GB         0
PC         0.20 Hz
RG         1.00
  
```

HP245.14.01-DMSO-1H

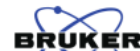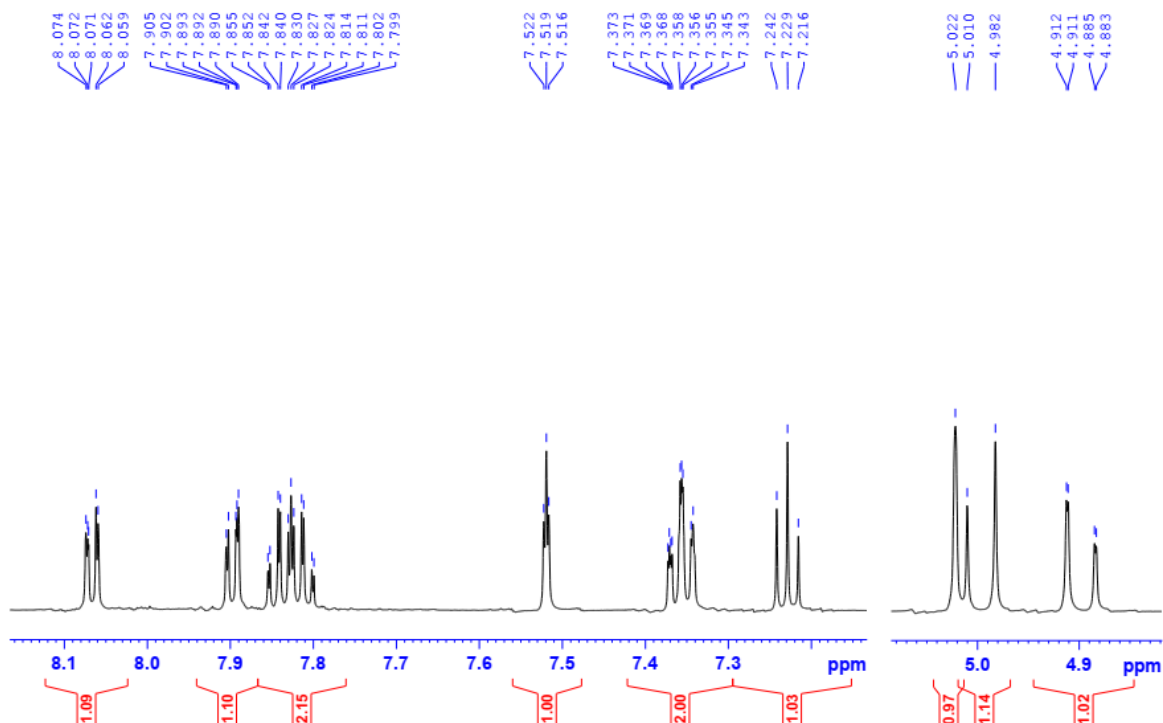

# 11-(Phenyl)-4,11-dihydrobenzo[g]furo[3,4-b]quinoline-1,5,10(3H) -trione (5d)

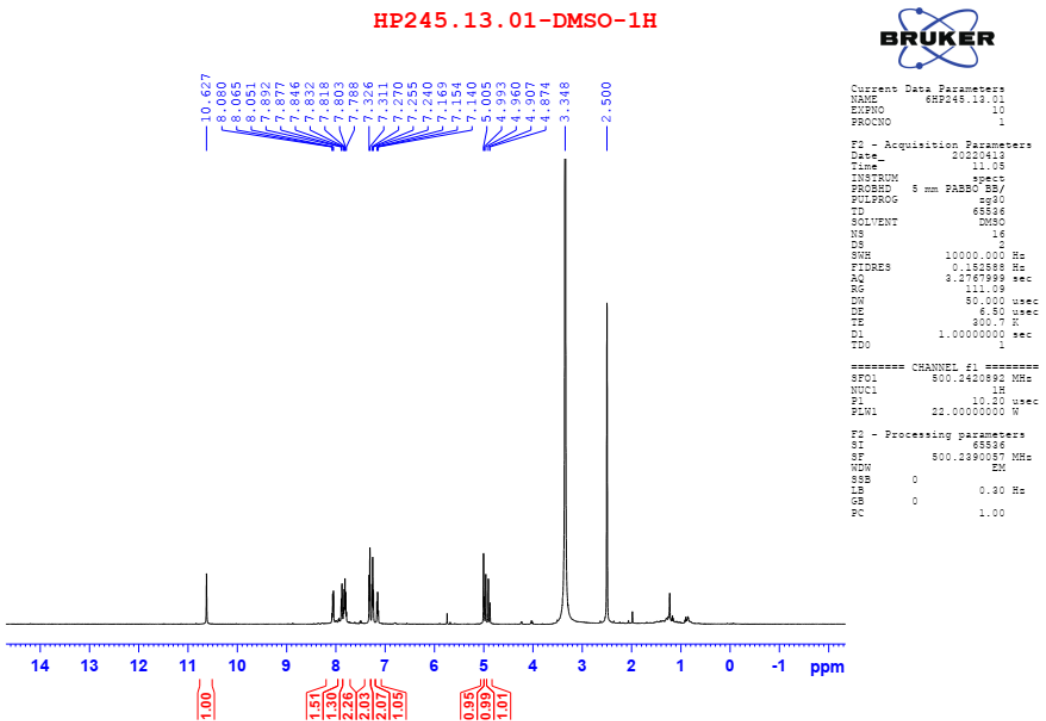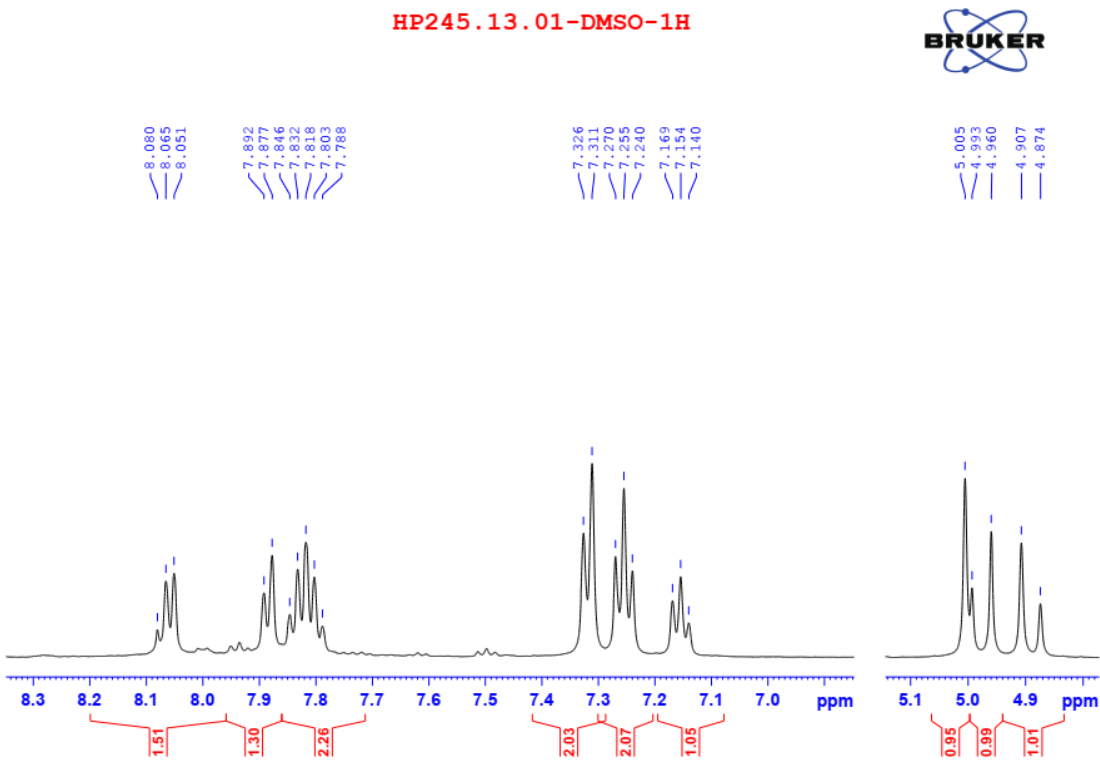

# 11-(2-Hydroxyphenyl)-4,11-dihydrobenzo[g]furo[3,4-b]quinoline-1,5,10(3H)-trione (5h)

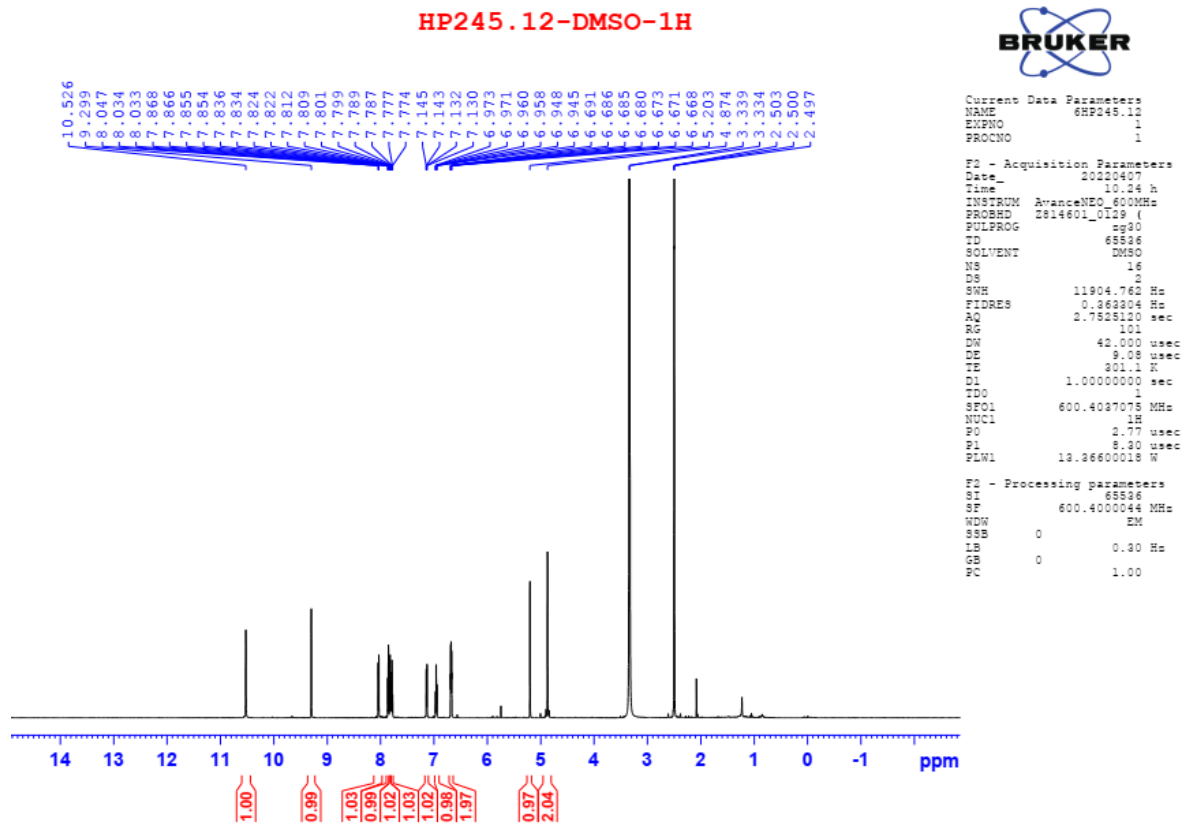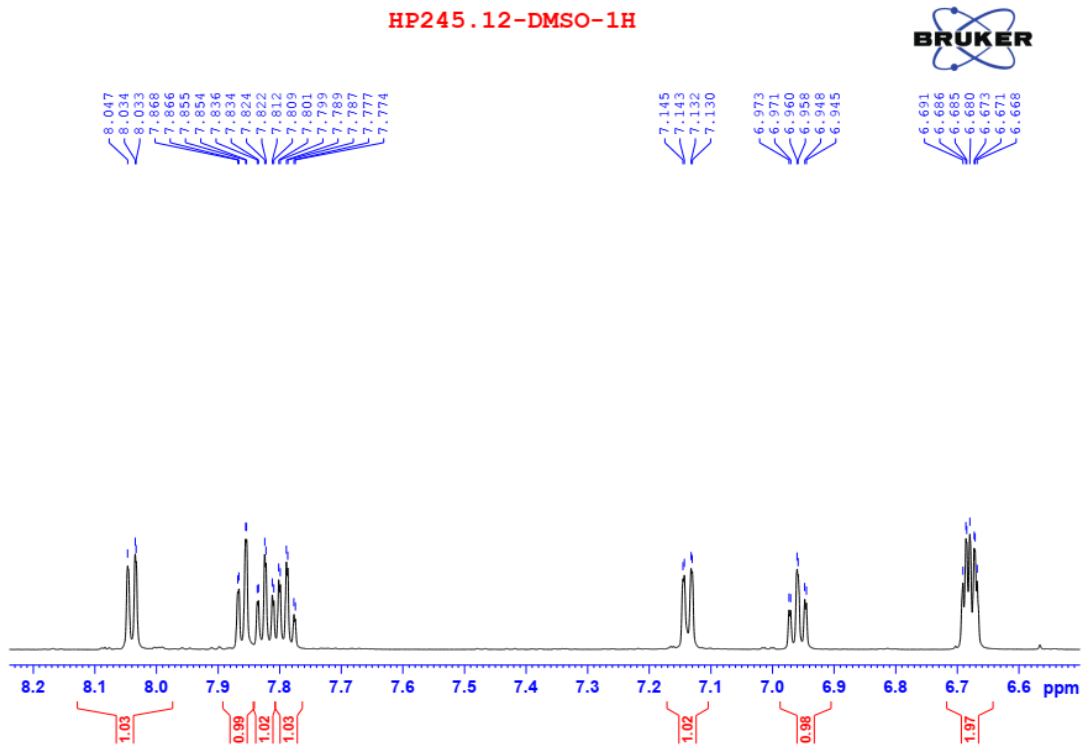

HP245.12-DMSO-C13CPD

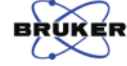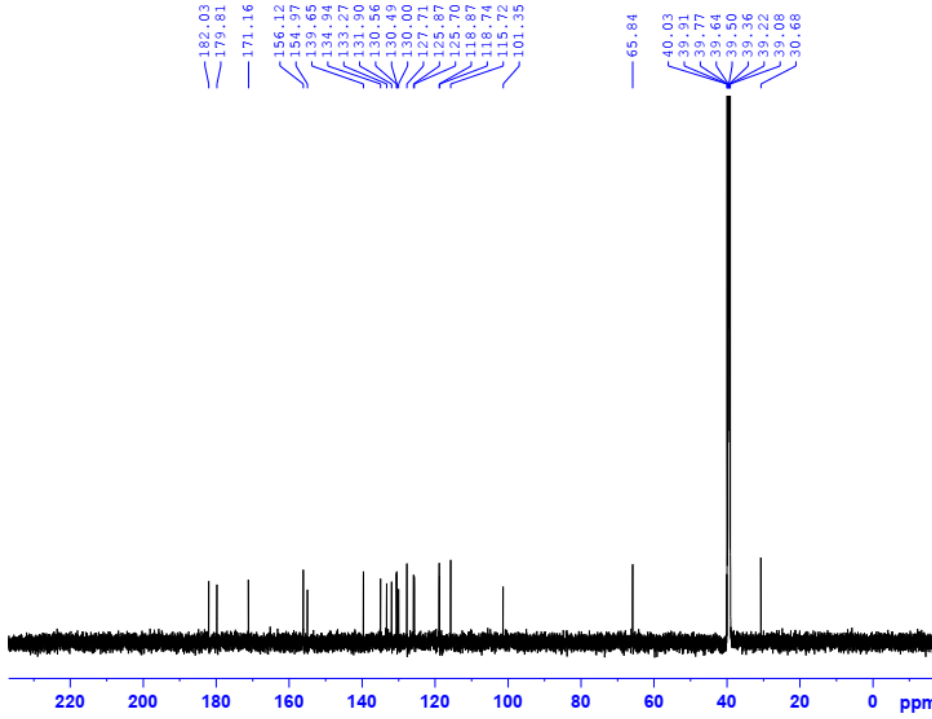

Current Data Parameters  
 NAME HP245.12  
 EXPNO 1  
 PROCNO 1  
 F2 - Acquisition Parameters  
 Date\_ 20200408  
 Time 13.28 h  
 INSTRUM AvanceNEO\_600MHz  
 PROBRD Csl4601\_0129 (4  
 PULPROG zgpg30  
 TD 65536  
 SOLVENT DMSO  
 NS 2048  
 DS 4  
 SWH 38461.80 Hz  
 FIDRES 1.173753 Hz  
 AQ 0.6519680 sec  
 RG 101  
 WM 13.200 usec  
 DE 6.50 usec  
 TE 302.4 K  
 DL 2.0000000 sec  
 D11 0.0300000 sec  
 TDD 1  
 SFO1 150.9873069 MHz  
 NUC1 13C  
 P0 5.29 usec  
 P1 16.00 usec  
 PLW1 112.9000153 W  
 SFO2 600.4024016 MHz  
 NUC2 1H  
 CPDPRG2 waltz16  
 PCPD2 70.00 usec  
 PLW2 12.2660018 W  
 PLW3 0.1878200 W  
 PLW4 0.09482000 W  
 F2 - Processing parameters  
 SI 32768  
 SF 150.9707748 MHz  
 WDN EM  
 SSB 0  
 LB 1.00 Hz  
 GB 0  
 PC 1.40

HP245.12-DMSO-C13CPD

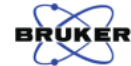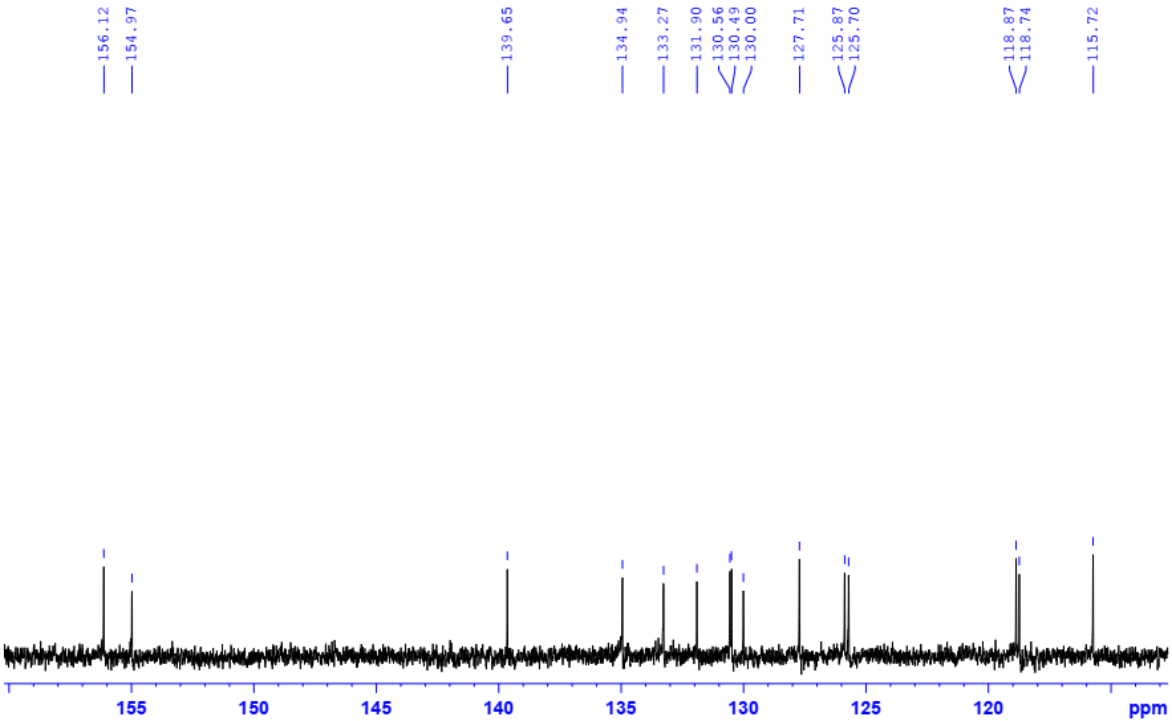



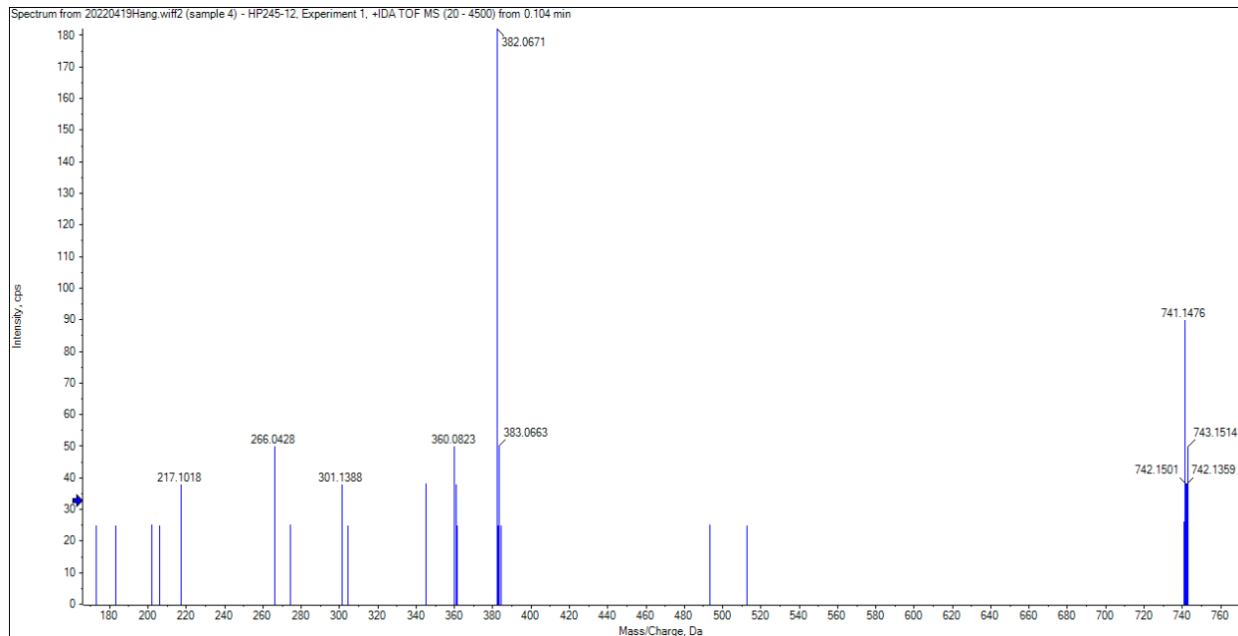

## 11-(4-Hydroxyphenyl)-4,11-dihydrobenzo[g]furo[3,4-b]quinoline-1,5,10(3H)-trione (5i)

HP245.17-DMSO-1H

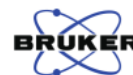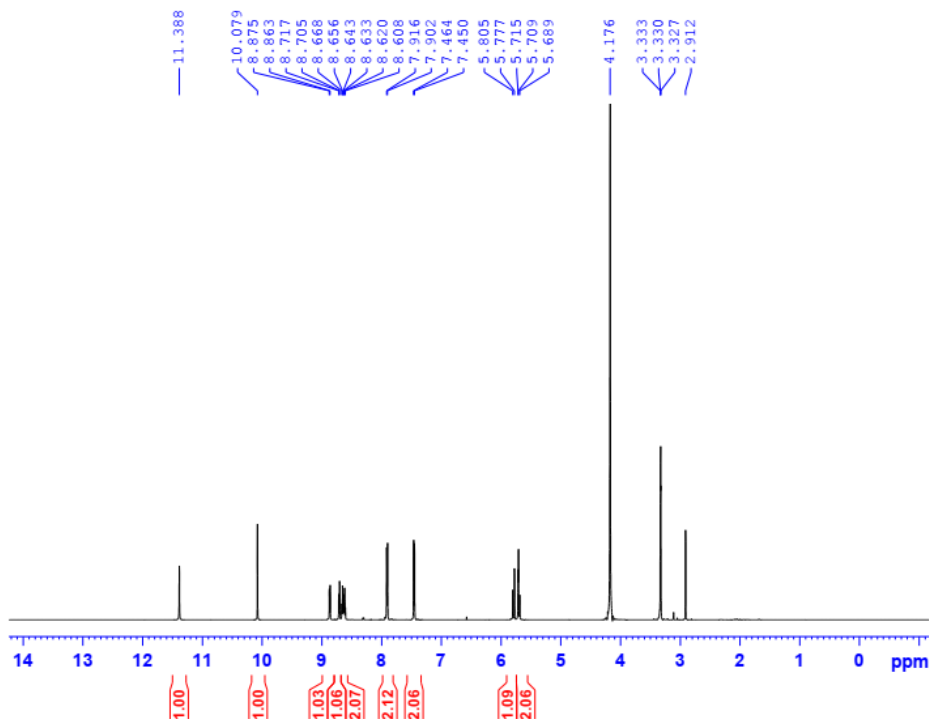

```

Current Data Parameters
NAME      6HP245.17
EXPNO    10
PROCNO   1

F2 - Acquisition Parameters
Date_    20220406
Time     17.26 h
INSTRUM  AvanceNEO_600MHz
PROBHD   ZB14601_0129 (
PULPROG  zgpg
TD       65536
SOLVENT  DMSO
NS       16
DS       2
SWH      11904.762 Hz
FIDRES   0.388304 Hz
AQ       2.7525120 sec
RG       101
DN       42.000 usec
DE       9.00 usec
TE       299.9 K
D1       1.00000000 sec
TDO      1
SFO1     600.4027075 MHz
NUC1     1H
PQ       2.77 usec
PI       8.30 usec
PLM1     13.36600018 W

F2 - Processing parameters
SI       65536
SF       600.3995065 MHz
WDW      EM
SSB      0
LB       0.30 Hz
GB       0
PC       1.00
  
```

HP245.17-DMSO-1H

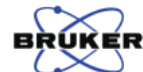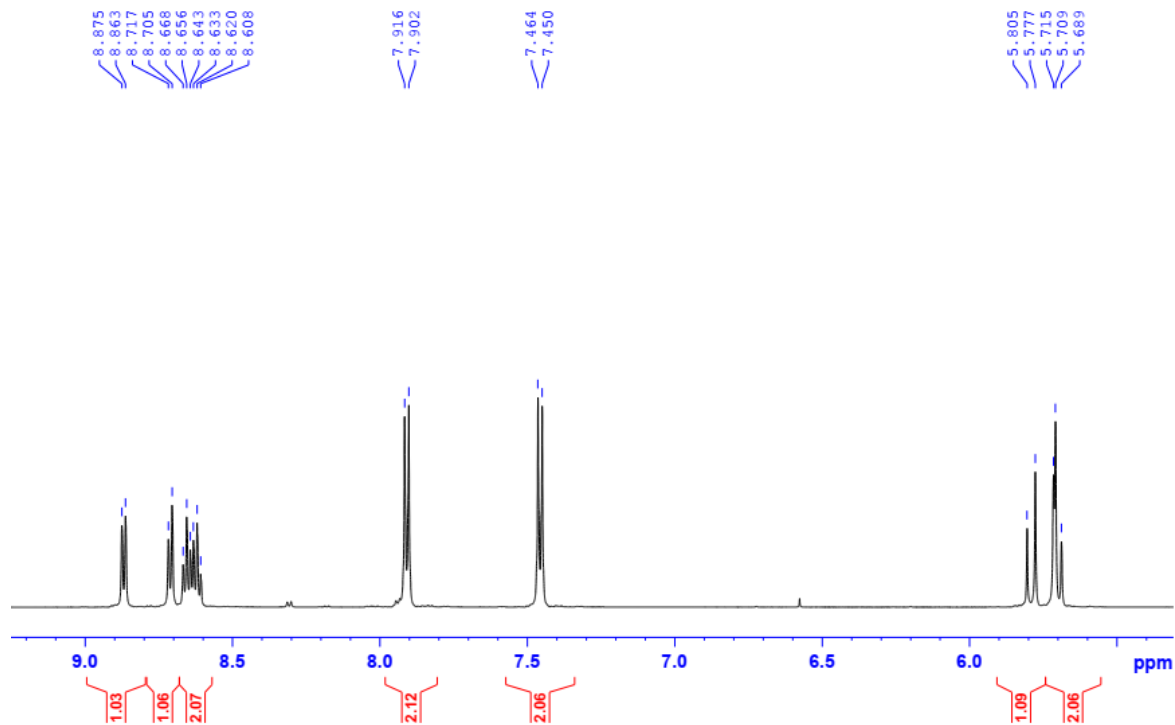

HP245.17-DMSO-C13CPD

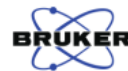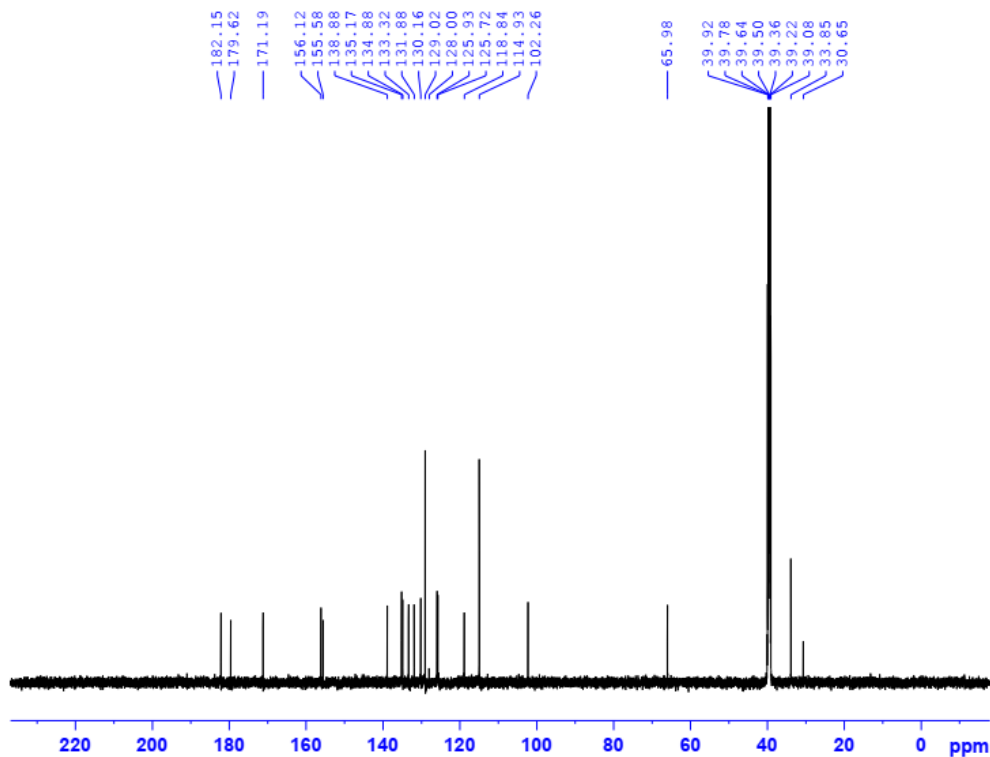

Current Data Parameters  
 NAME HP245.17  
 EXPNO 2  
 PROCNO 1

F2 - Acquisition Parameters  
 Date\_ 20230408  
 Time 22.05 h  
 INSTRUM AvanceNeo\_500MHz  
 PROBRD zsl4601\_0129 (4  
 PULPROG zgpg30  
 TD 65536  
 ID 65536  
 SOLVENT DMSO  
 NS 1024  
 DS 4  
 SWH 38461.539 Hz  
 FIDRES 1.173753 Hz  
 AQ 0.8519680 sec  
 RG 101  
 DM 12.000 usec  
 DE 6.50 usec  
 TE 302.3 K  
 D1 2.00000000 sec  
 D11 0.03000000 sec  
 TD 1  
 SFO1 150.9873069 MHz  
 NUC1 13C  
 P0 5.33 usec  
 P1 14.00 usec  
 PLM1 113.90000182 W  
 SFO2 600.4024016 MHz  
 NUC2 1H  
 CPDPRG12 waltz65  
 PCPDG 70.00 usec  
 PLM2 13.36600018 W  
 PLM12 0.18792000 W  
 PLM13 0.09452000 W

F2 - Processing parameters  
 SI 32768  
 SF 150.9707749 MHz  
 WDM EM  
 SSB 0  
 LB 1.00 Hz  
 GB 0  
 PC 1.40

HP245.17-DMSO-C13CPD

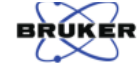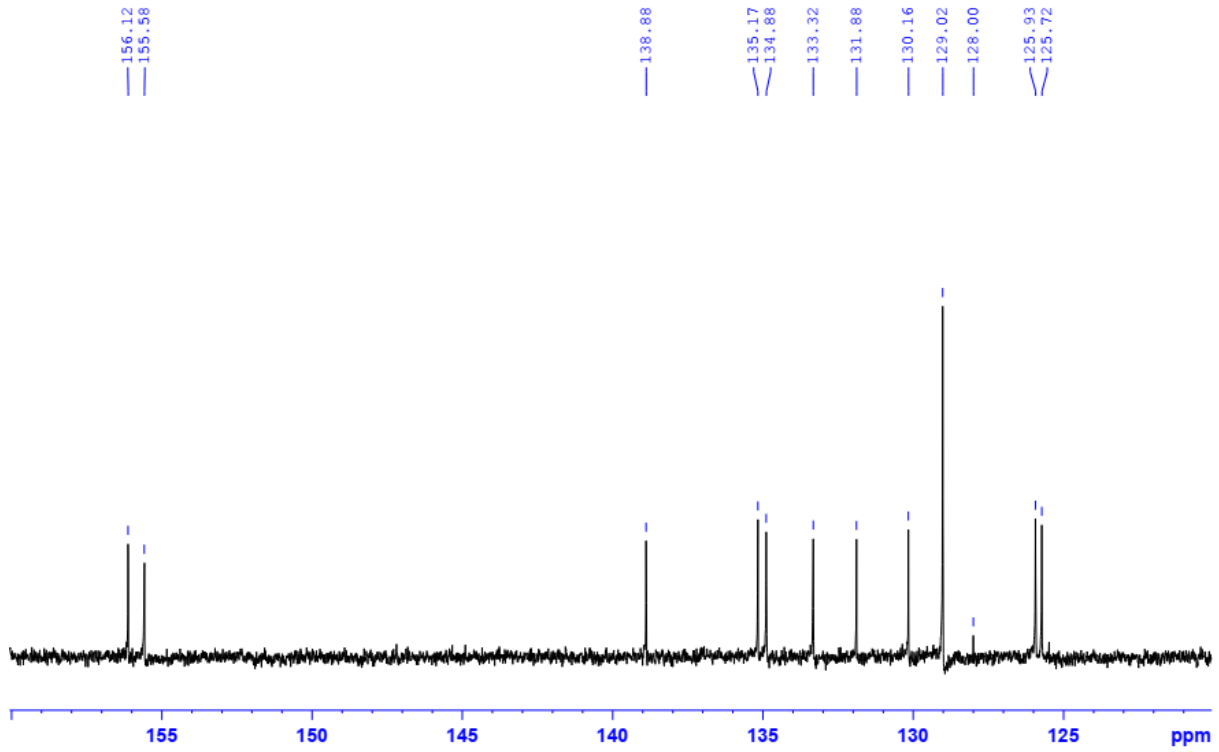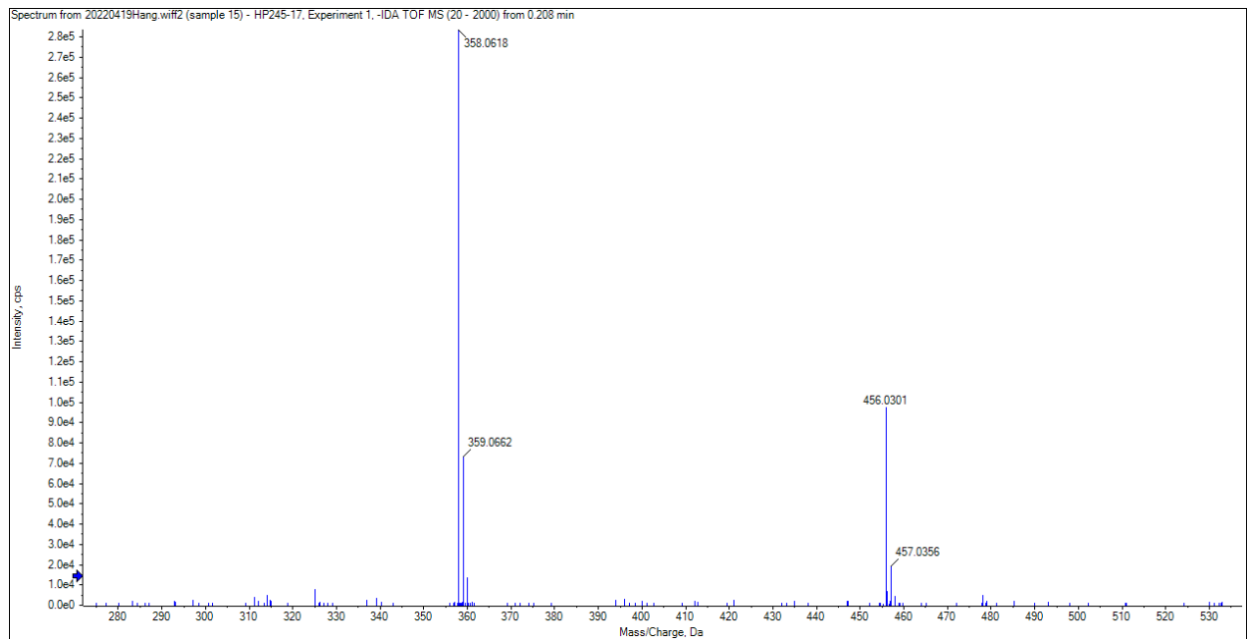

11-(4-Nitrophenyl)-4,11-dihydrobenzo[g]furo[3,4-b]quinoline-1,5,10(3H)-trione (5j).

HP245.19-DMSO-1H

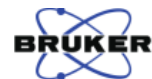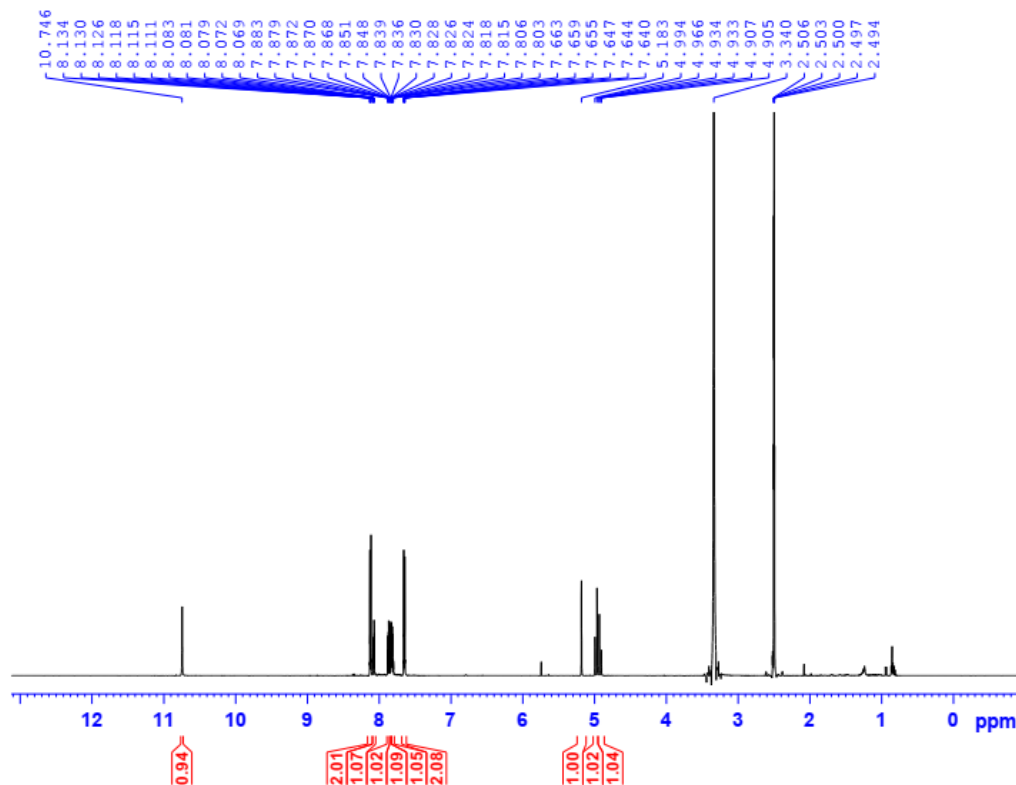

Current Data Parameters  
NAME HP245.19  
EXPNO 10  
PROCNO 1

F2 - Acquisition Parameters  
Date\_ 20220408  
Time 14.44 h  
INSTRUM AvanceNeo 600MHz  
PROBHD ZS14601-Q129 (1  
PULPROG zg30  
TD 65536  
SOLVENT DMSO  
NS 16  
DS 2  
SWH 11904.762 Hz  
FIDRES 0.362204 Hz  
AQ 2.7525120 sec  
RG 101  
DN 42.000 usec  
DE 9.08 usec  
TE 302.1 K  
D1 1.00000000 sec  
TD0 1  
SFO1 600.4027075 MHz  
NUC1 1H  
FO 2.77 usec  
F1 8.30 usec  
PLM1 13.26600018 W

F2 - Processing parameters  
SI 65536  
SF 600.4000048 MHz  
WDW EM  
SSB 0  
LB 0.30 Hz  
GB 0  
PC 1.00

HP245.19-DMSO-1H

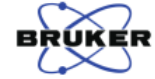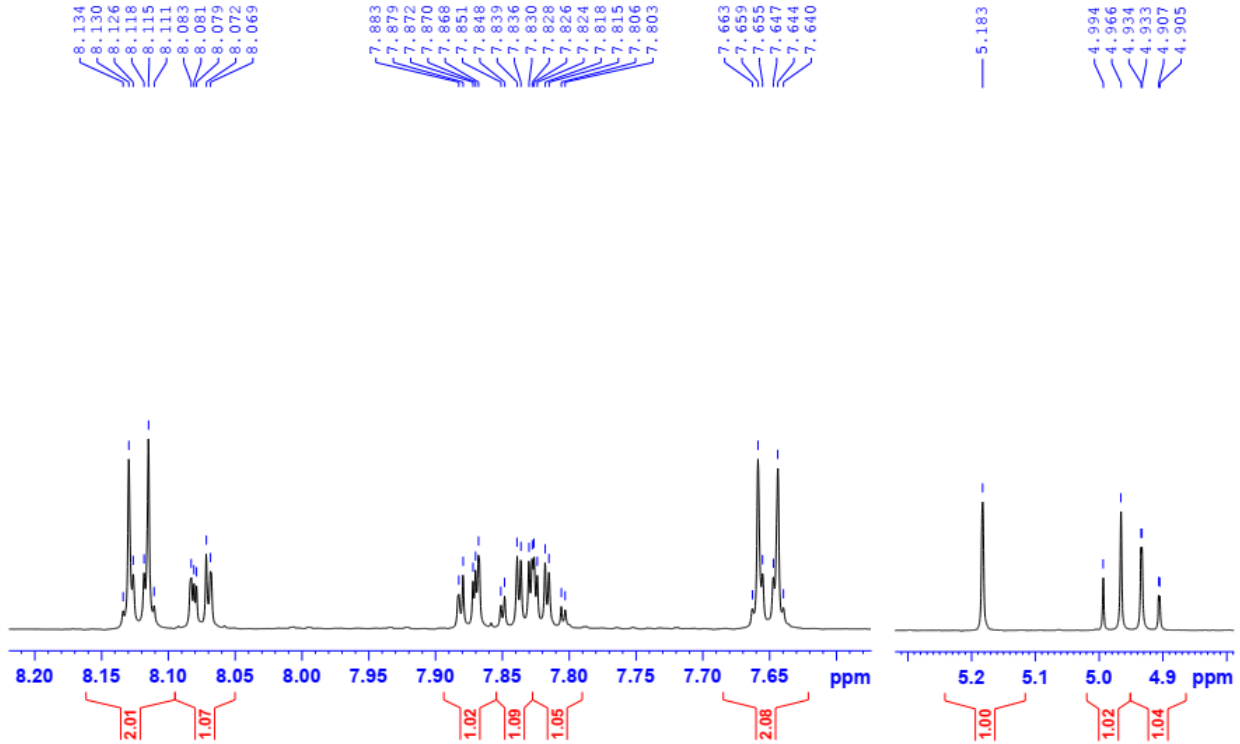

HP245.19-DMSO-C13CPD

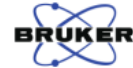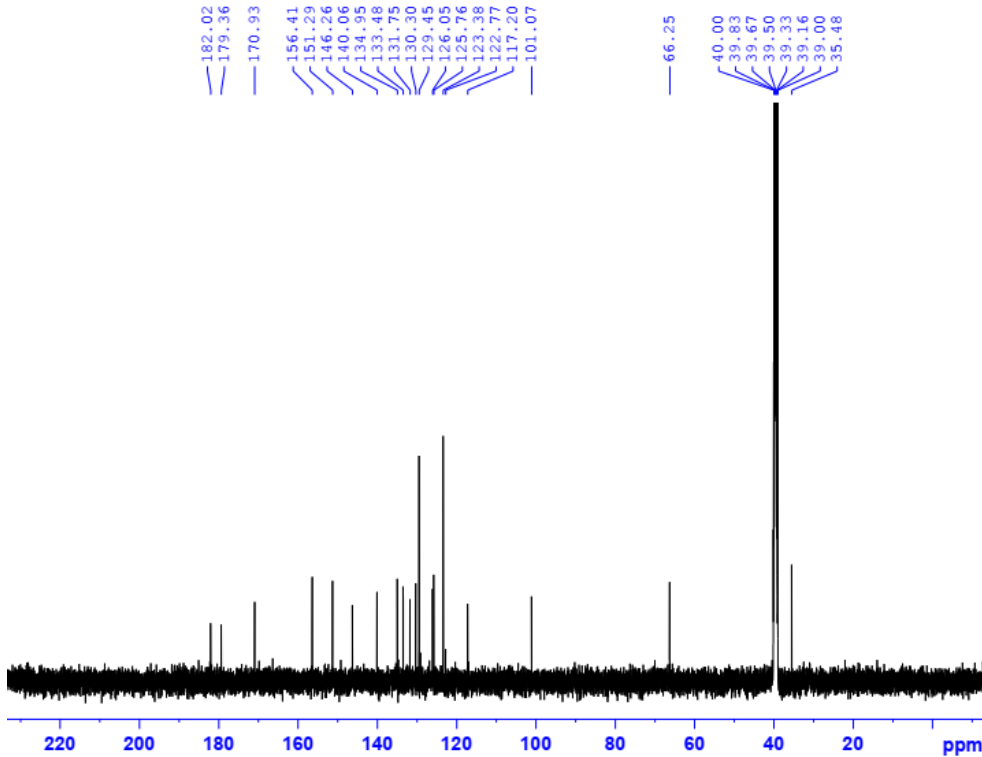

```

Current Data Parameters
NAME      HP245.19
EXPNO    1
PROCNO   1

F2 - Acquisition Parameters
Date_    20220415
Time     2.34
INSTRUM  spect
PROBHD   5 mm PABBO BB/
PULPROG  zgpg30
TD       65536
SOLVENT  DMSO
NS       1024
DS       4
SWH      31250.000 Hz
FIDRES   0.476897 Hz
AQ       1.0485760 sec
RG       198.57
DW       16.000 usec
DE       6.50 usec
TE       302.6 K
D1       2.0000000 sec
D11      0.0300000 sec
TD0      1

===== CHANNEL f1 =====
SFO1    125.7690220 MHz
NUC1     13C
P1      10.00 usec
PLW1    88.0000000 W

===== CHANNEL f2 =====
SFO2    500.2410010 MHz
NUC2     1H
CPDPRG2 waltz16
PCPD2   80.00 usec
PLW2    22.0000000 W
PLM12   0.28764000 W
PLM13   0.17989001 W

F2 - Processing parameters
SC      32768
SF      125.7652581 MHz
WDW     EM
SSB     0
LB      1.00 Hz
GB      0
PC      1.40
    
```

HP245.19-DMSO-C13CPD

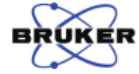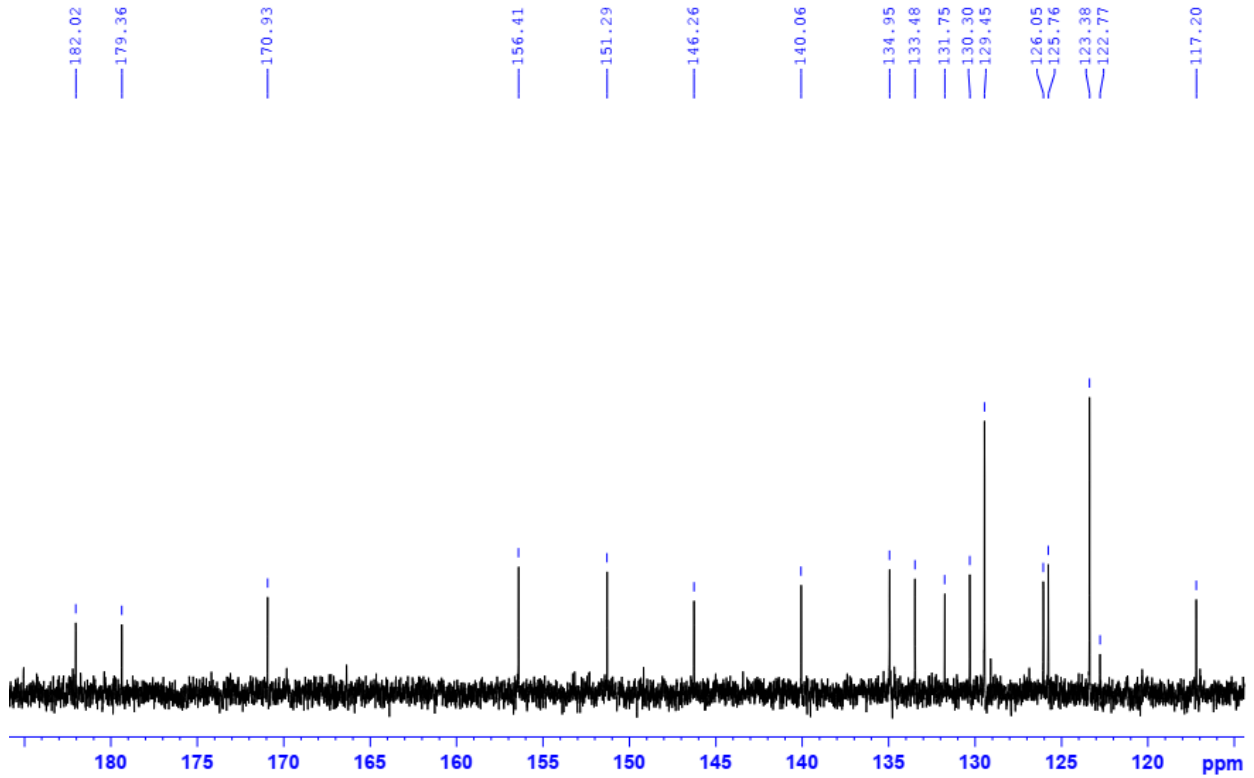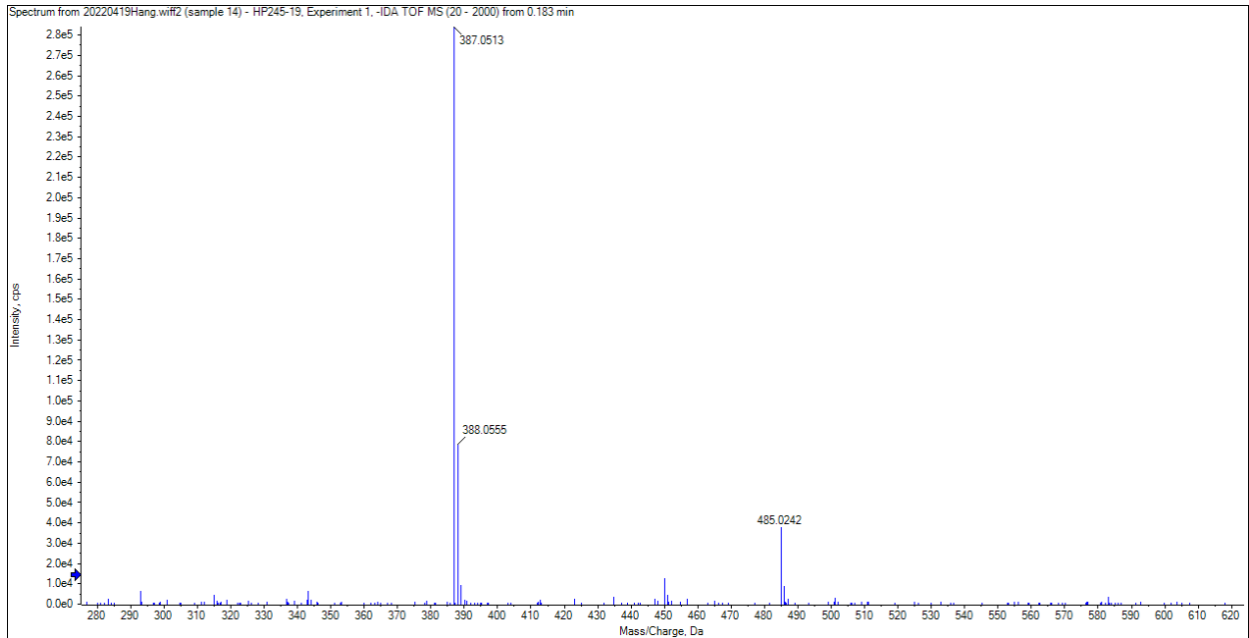

4-(1,5,10-Trioxo-1,3,4,5,10,11-hexahydrobenzo[g]furo[3,4-b]quinolin-11-yl)benzotrile  
(5k).

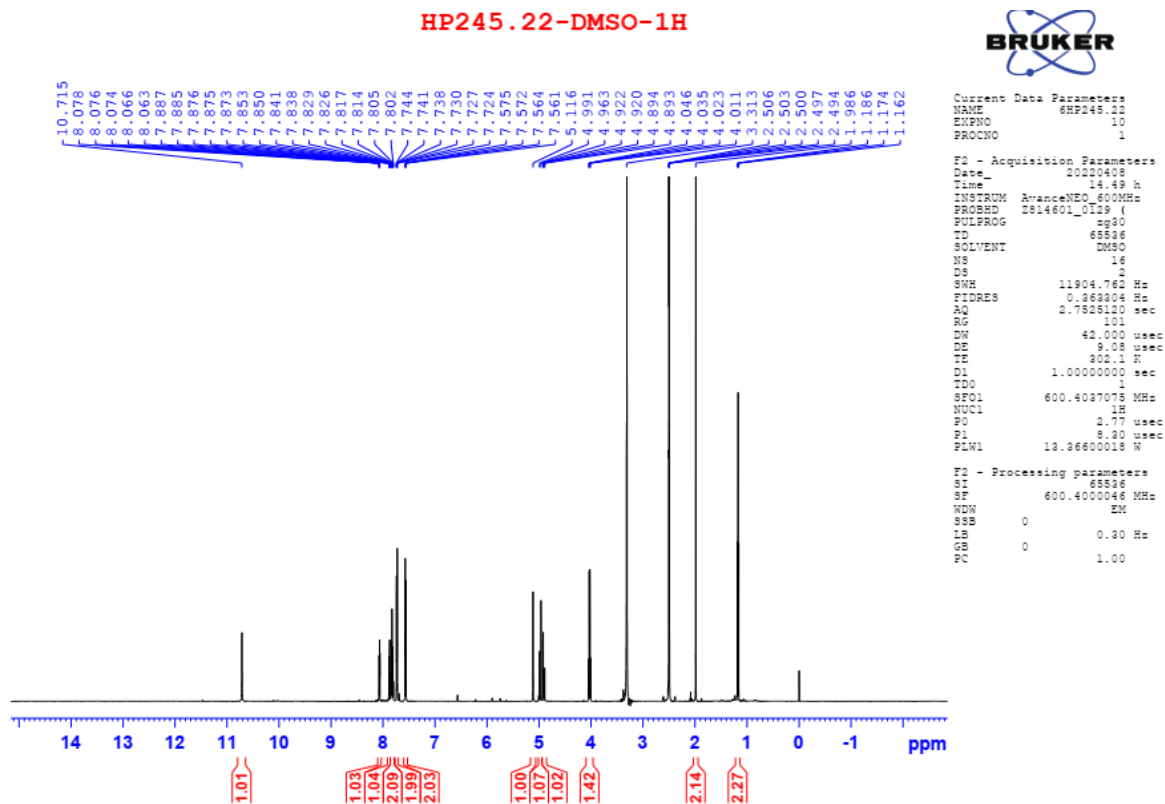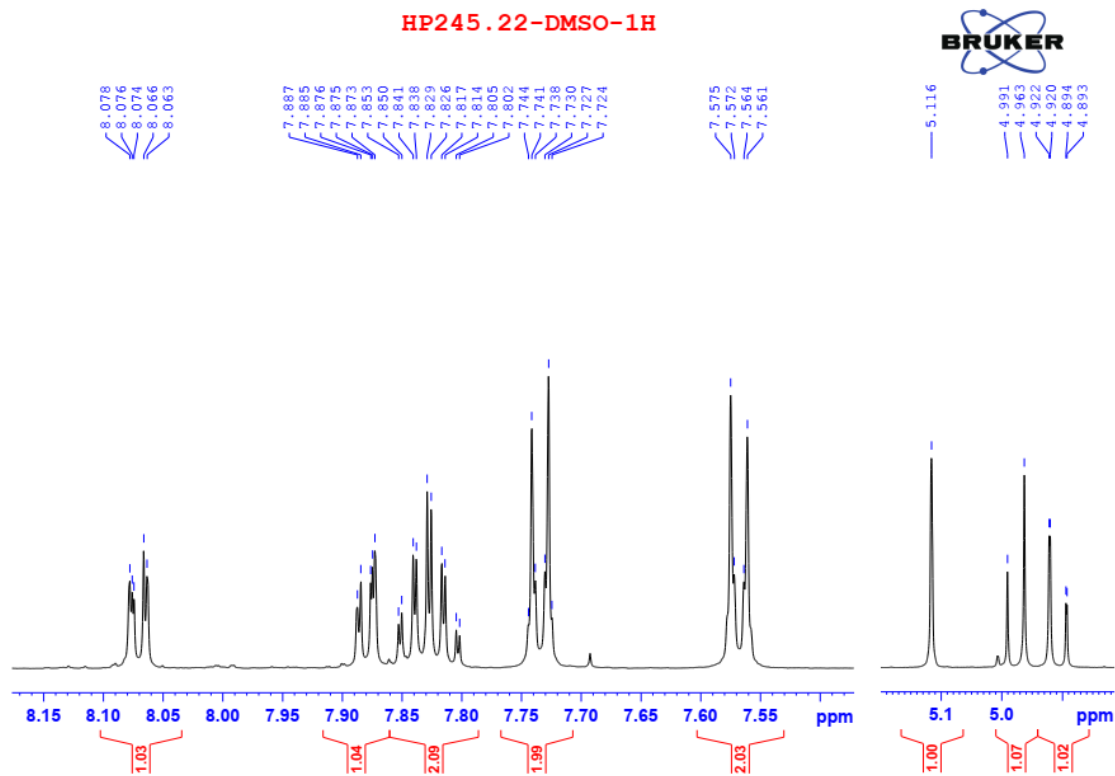

HP245.22-DMSO-C13CPD

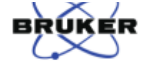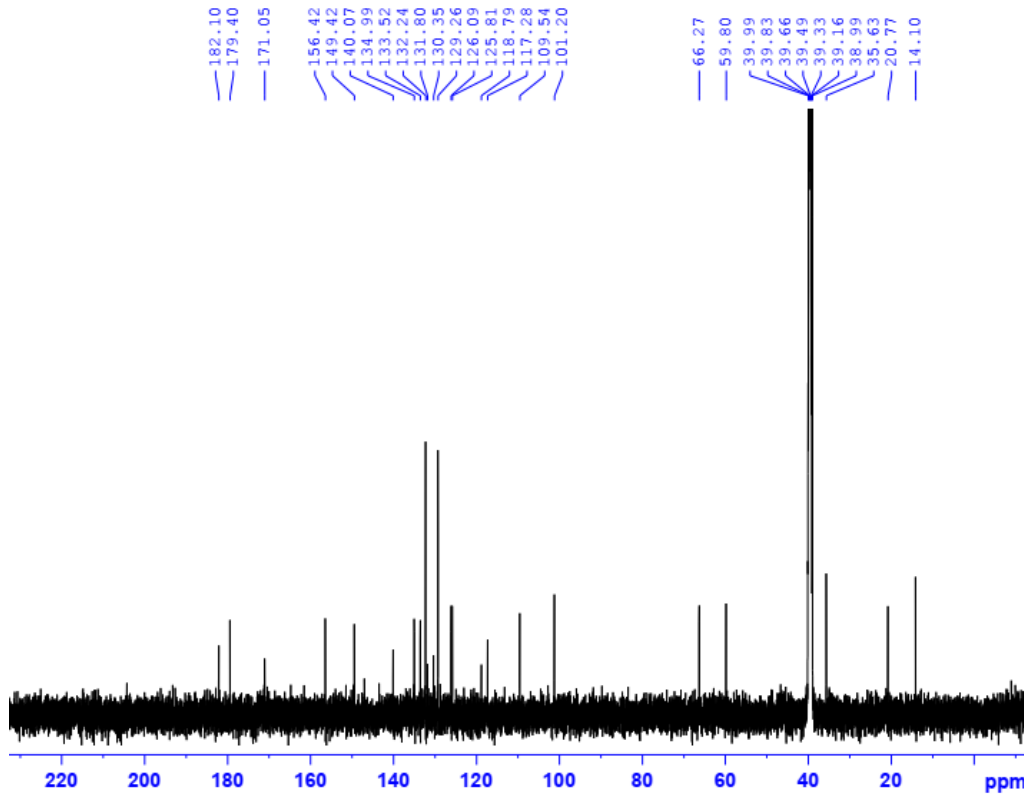

Current Data Parameters  
 NAME 6HP245.22  
 EXPNO 2  
 PROCNO 1

F2 - Acquisition Parameters  
 Date\_ 20220418  
 Time 4.27  
 INSTRUM spect  
 PROBHD 5 mm PABBO BB/  
 PULPROG zgpg30  
 TD 6526  
 SOLVENT DMSO  
 NS 1024  
 DS 4  
 SWH 31250.000 Hz  
 FIDRES 0.476837 Hz  
 AQ 1.0485760 sec  
 RG 198.57  
 DM 16.0000 usec  
 DE 6.50 usec  
 TE 303.0 K  
 DL 2.00000000 sec  
 D11 0.03000000 sec  
 TDO 1

===== CHANNEL f1 =====  
 SF01 125.7990330 MHz  
 NUC1 13C  
 P1 10.00 usec  
 PLW1 88.00000000 W

===== CHANNEL f2 =====  
 SF02 500.2410010 MHz  
 NUC2 1H  
 CPDPRG2 waltz16  
 PCPD2 80.00 usec  
 PLN2 22.00000000 W  
 PLW2 0.38764000 W  
 PLW3 0.17989001 W

F2 - Processing parameters  
 SF 125.7825226 MHz  
 WDW EM  
 SSB 0  
 LB 1.00 Hz  
 GB 0  
 PC 1.40

HP245.22-DMSO-C13CPD

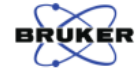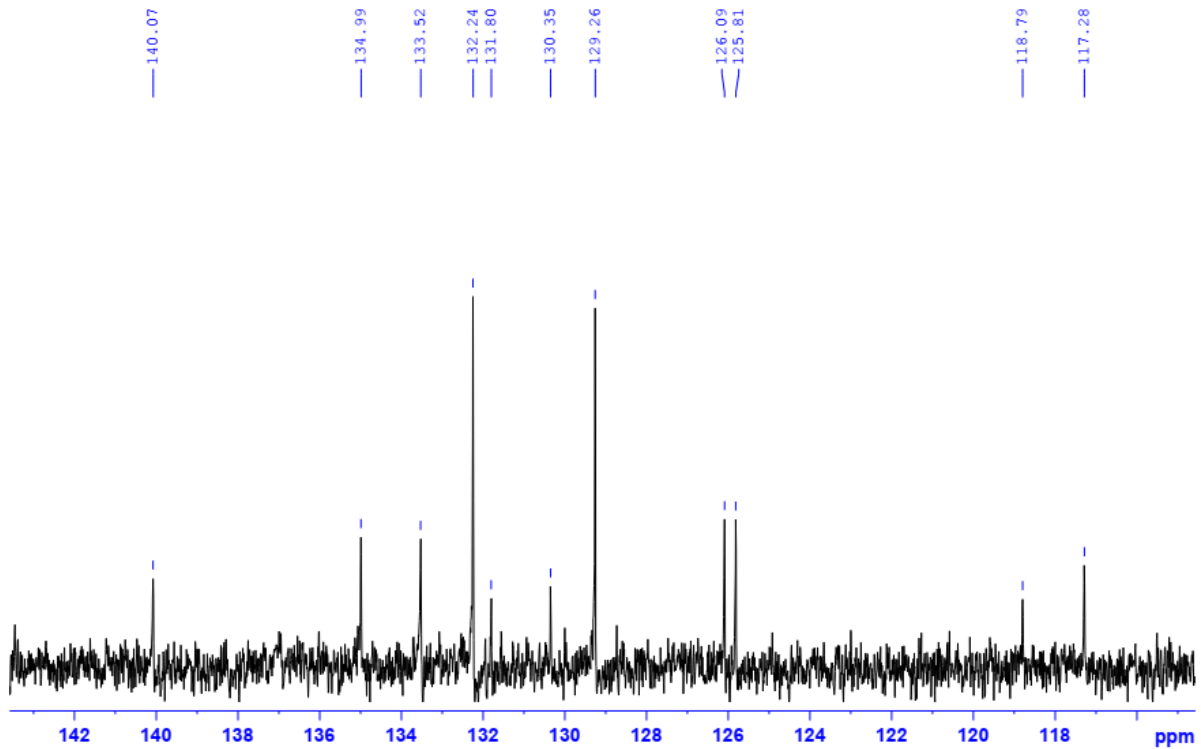



11-(3,4-Dimethoxyphenyl)-4,11-dihydrobenzo[g]furo[3,4-b]quinoline-1,5,10(3H)-trione (5l).

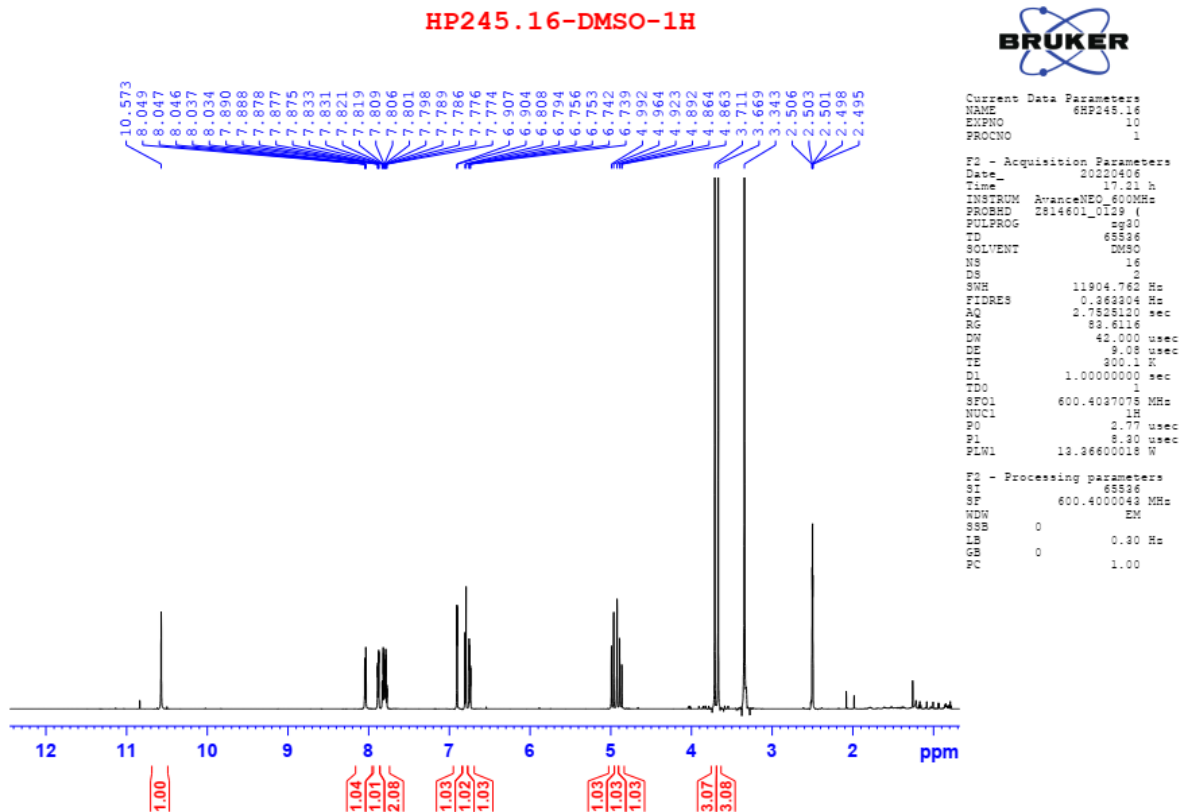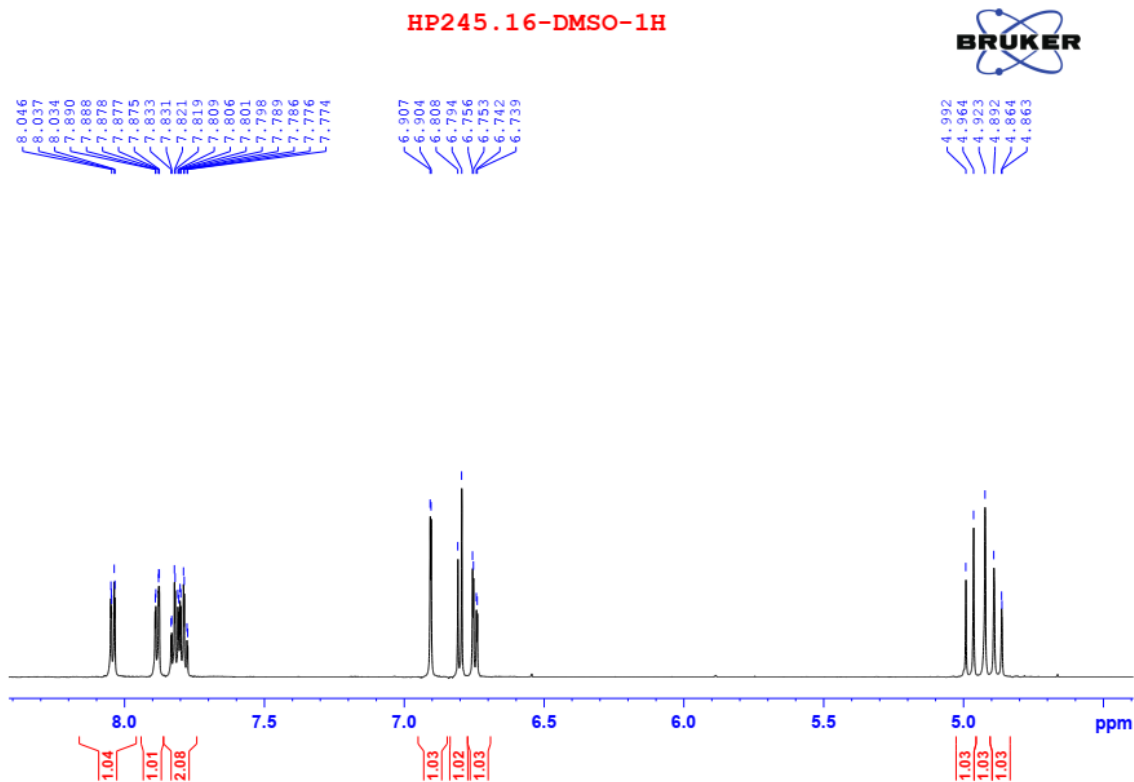

HP245.16-DMSO-C13CPD

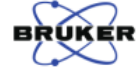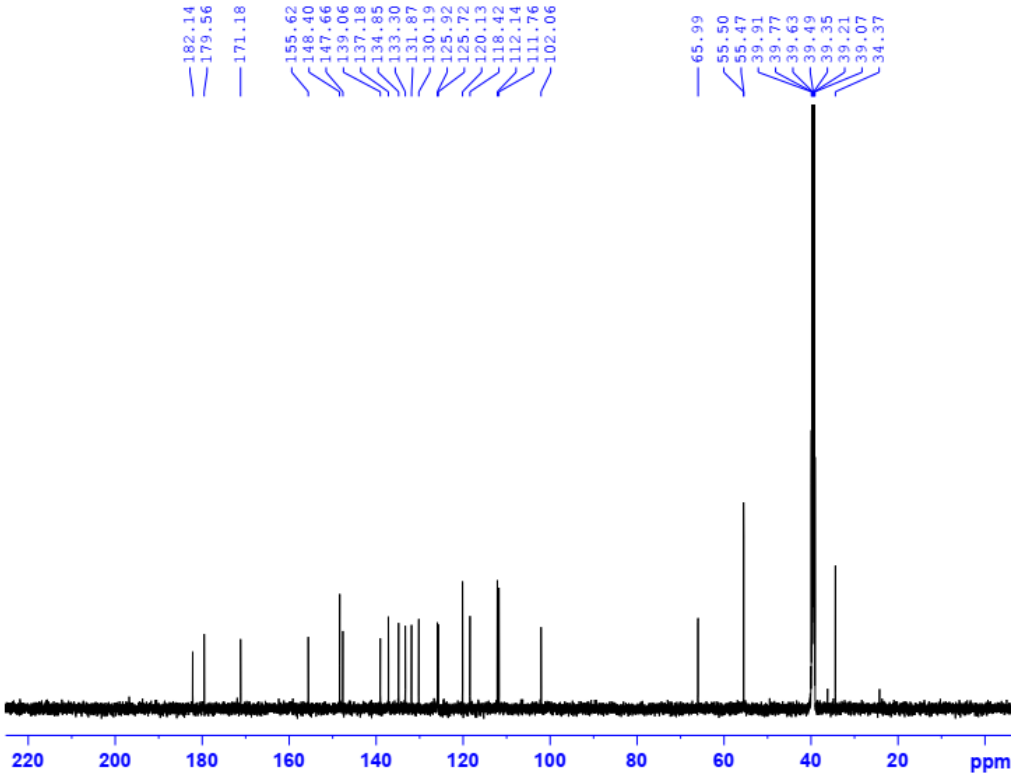

```

Current Data Parameters
NAME      HP245.16
EXPNO    1
PROCNO   1

F2 - Acquisition Parameters
Date_    20220408
Time     16.07 h
INSTRUM  AvanceNEO_600MHz
PROBHD   zgpg30
PULPROG  zgpg30
TD       65536
SOLVENT  DMSO
NS       512
DS       4
SWH      38461.539 Hz
FIDRES   1.173753 Hz
AQ       0.8519680 sec
RG       101
DW       13.000 usec
DE       6.50 usec
TE       302.6 K
D1       2.0000000 sec
D11      0.0300000 sec
TDO      0
SFO1     150.9873069 MHz
NUC1     13C
PC       5.33 usec
PI       16.00 usec
PLM1     112.8000015 W
SFO2     600.4024016 MHz
NUC2     1H
CPDPRG2  waltz16
PCPD2    70.00 usec
PMD2     13.3660018 W
PLM2     0.18782000 W
PLM3     0.09452000 W

F2 - Processing parameters
SI       32768
SF       150.9707766 MHz
WDW      EM
SSB      0
LB       1.00 Hz
GB       0
PC       1.40
    
```

HP245.16-DMSO-C13CPD

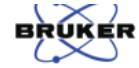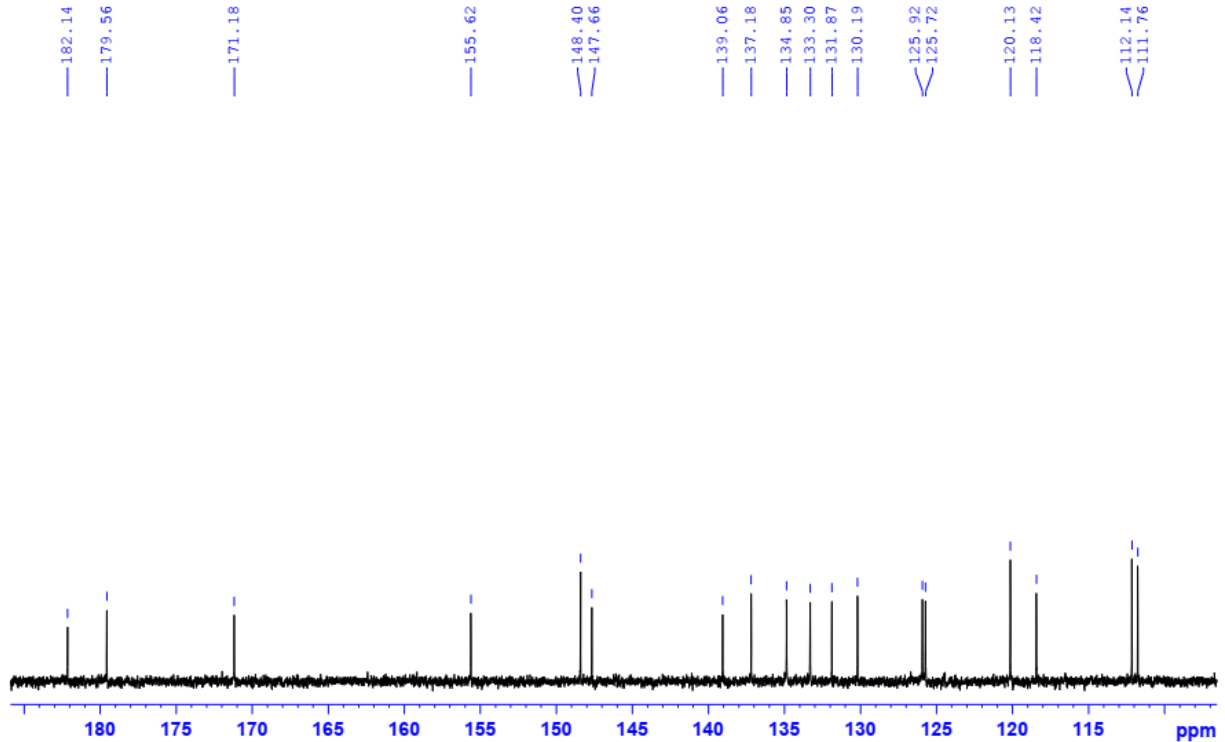

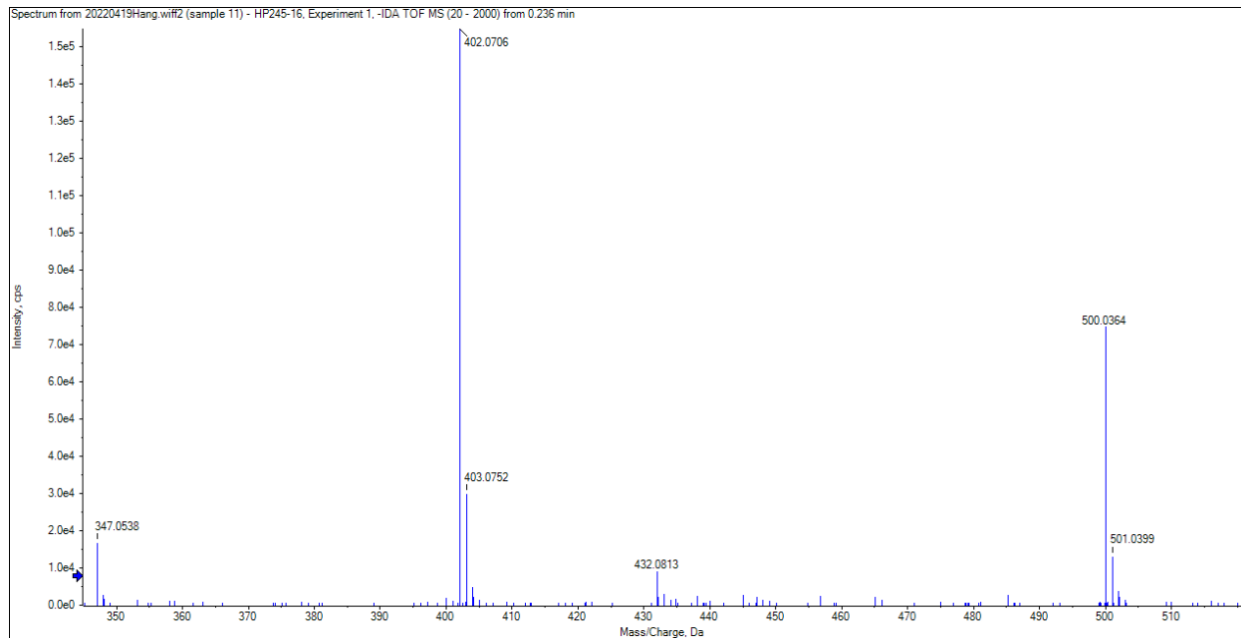

**11-(3,4,5-Trimethoxyphenyl)-4,11-dihydrobenzo[g]furo[3,4-b]quinoline-1,5,10(3H)-trione (5m).**

HP245.03-DMSO-1H

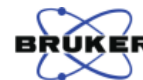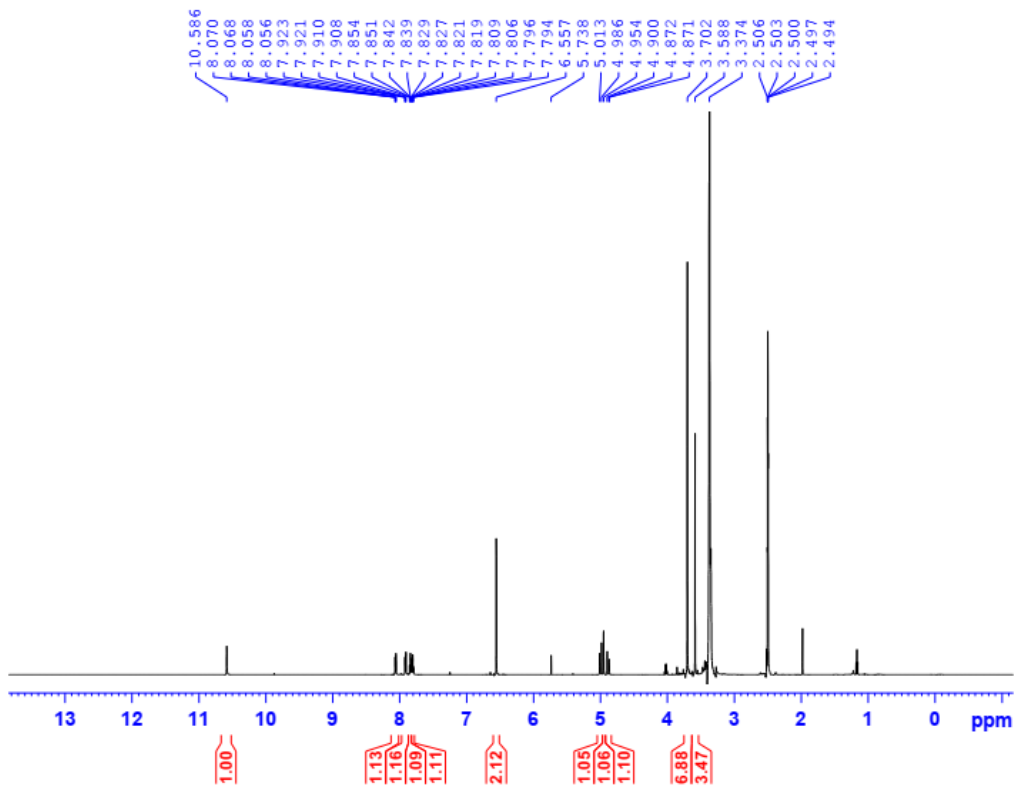

```

Current Data Parameters
NAME      6HP245.03
EXPNO    10
PROCNO   1

F2 - Acquisition Parameters
Date_    20220329
Time     17.46 h
INSTRUM  Avance NEO 600MHz
PROBHD   zgpg30
PULPROG  zgpg30
TD        65536
SOLVENT  DMSO
NS        16
DS        2
SWH       11904.762 Hz
FIDRES   0.362304 Hz
AQ        2.7828120 sec
RG        82.0467
DM        42.000 usec
DE        9.08 usec
TE        301.2 K
D1        1.00000000 sec
TDO       1
SFO1     600.4037075 MHz
NUC1     1H
FO       2.77 usec
F1       8.20 usec
PLW1     13.26600018 W

F2 - Processing parameters
SI        65536
SF        600.4000044 MHz
WDW       EM
SSB       0
LB        0.30 Hz
GB        0
WC        1.00
  
```

HP245.03-DMSO-1H

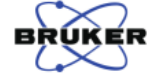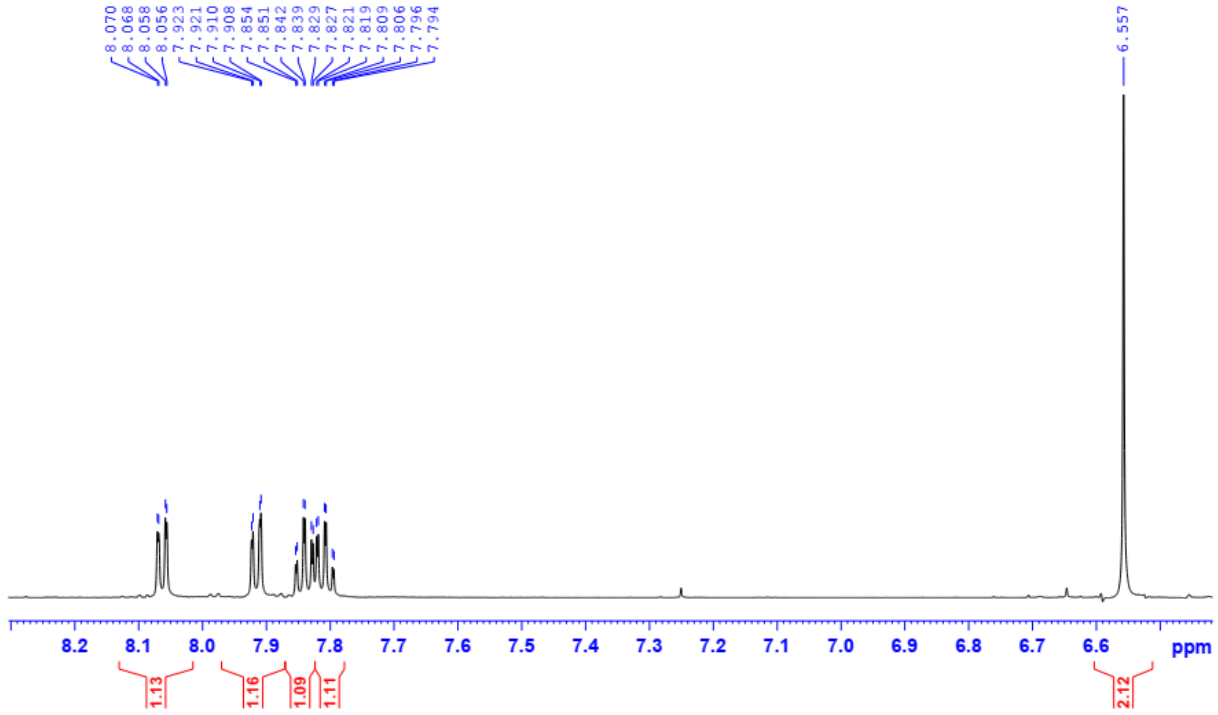

HP245.03-DMSO-C13CPD

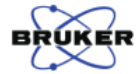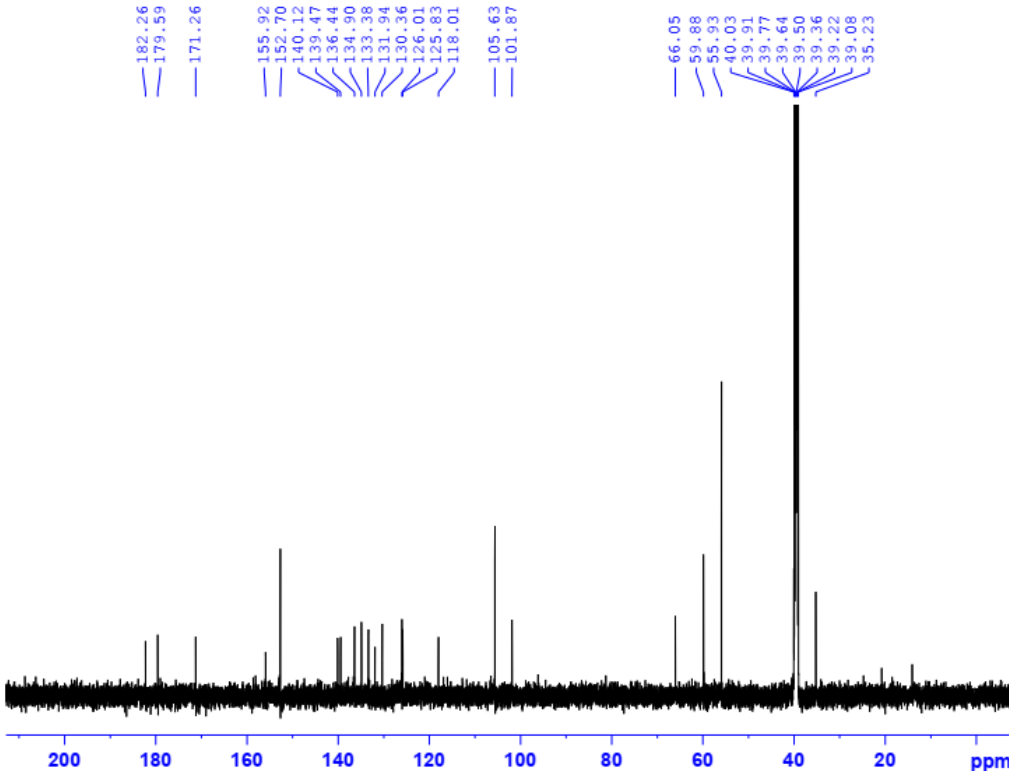

Current Data Parameters  
 NAME HP245.03  
 EXPNO 2  
 PROCNO 1

F2 - Acquisition Parameters  
 Date\_ 20220320  
 Time 19.26 h  
 INSTRUM AvanceNEO\_600MHz  
 PROBHD Z814601\_0129 (4  
 FULPROG zgpg30  
 TD 65536  
 SOLVENT DMSO  
 NS 1024  
 DS 4  
 SWH 35714.288 Hz  
 FIDRES 1.059913 Hz  
 AQ 0.9175040 sec  
 RG 101  
 DW 14.000 usec  
 DE 6.50 usec  
 TE 301.1 K  
 D1 2.00000000 sec  
 D11 0.03000000 sec  
 TD0 1  
 SF01 150.9857972 MHz  
 NUC1 13C  
 PU 5.33 usec  
 P1 16.00 usec  
 PLN1 113.90000159 W  
 SF02 600.4024016 MHz  
 NUC2 1H  
 CPDPRG13 waltz168  
 PCPD2 70.00 usec  
 PLM2 13.26600018 W  
 PLN12 0.18792000 W  
 PLN13 0.09452000 W

F2 - Processing parameters  
 SI 32768  
 SF 150.9707682 MHz  
 WDW EM  
 SSB 0  
 LB 1.00 Hz  
 GB 0  
 PC 1.40

HP245.03-DMSO-C13CPD

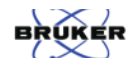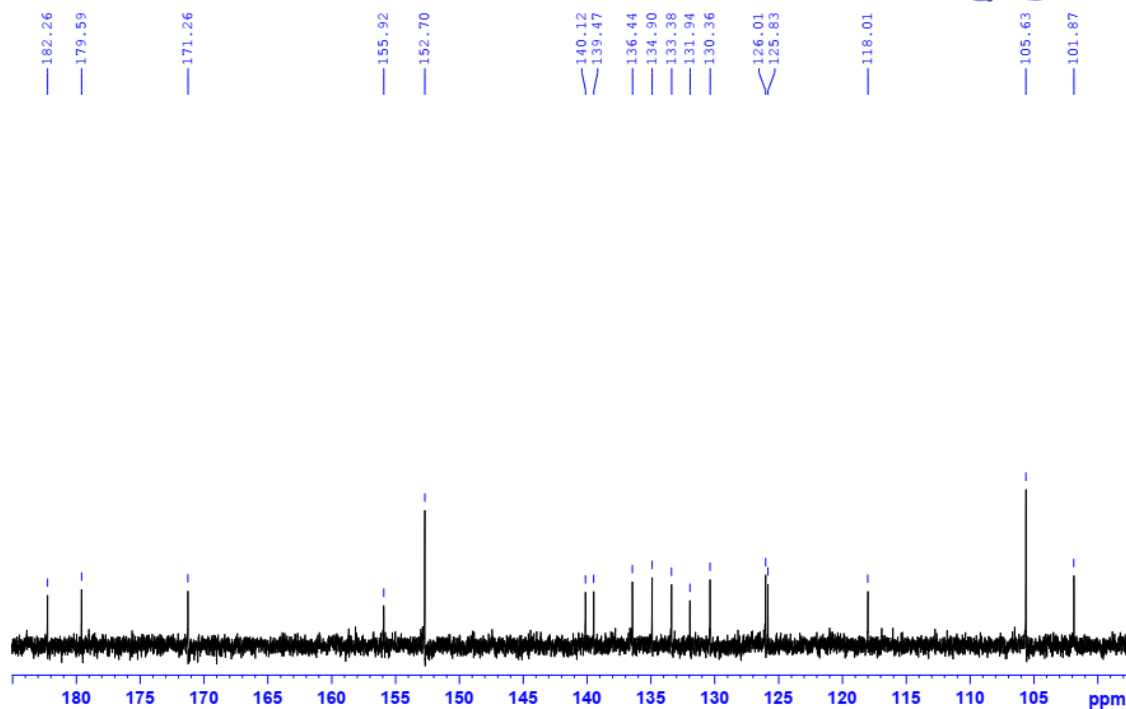

11-(Pyridin-3-yl)-4,11-dihydrobenzo[g]furo[3,4-b]quinoline-1,5,10(3H)-trione (5n).

HP245.05-DMSO-1H

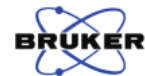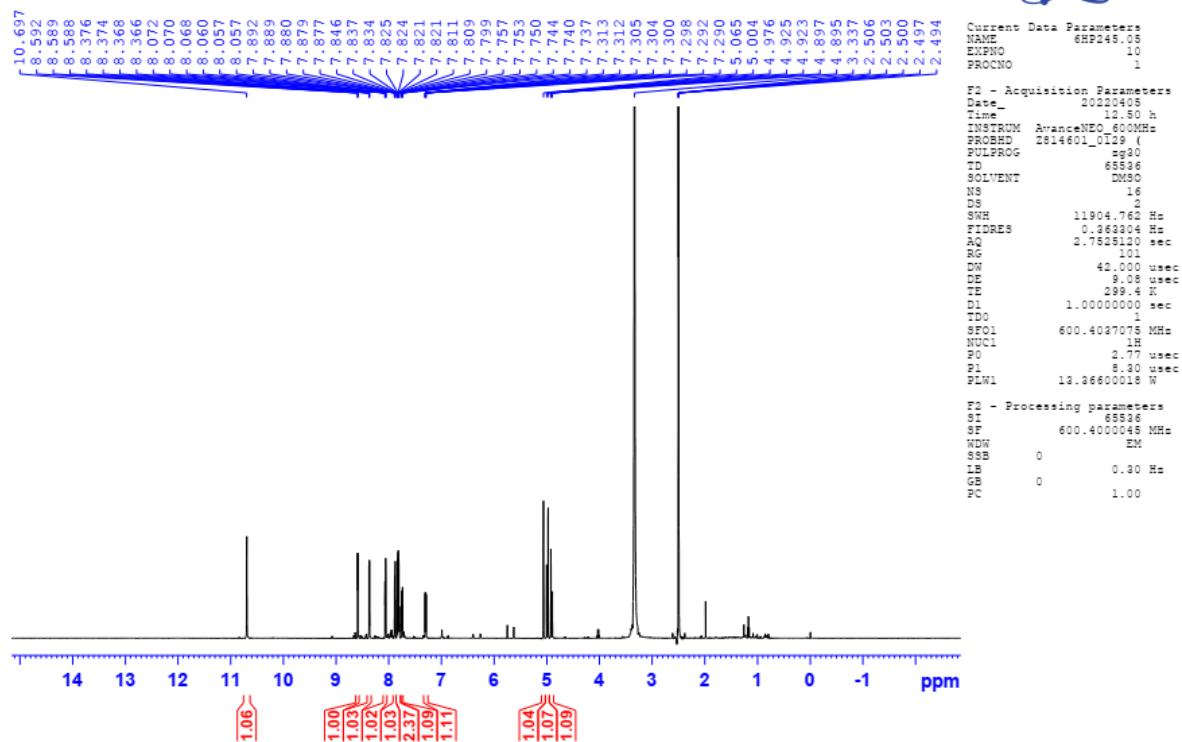

HP245.05-DMSO-1H

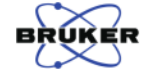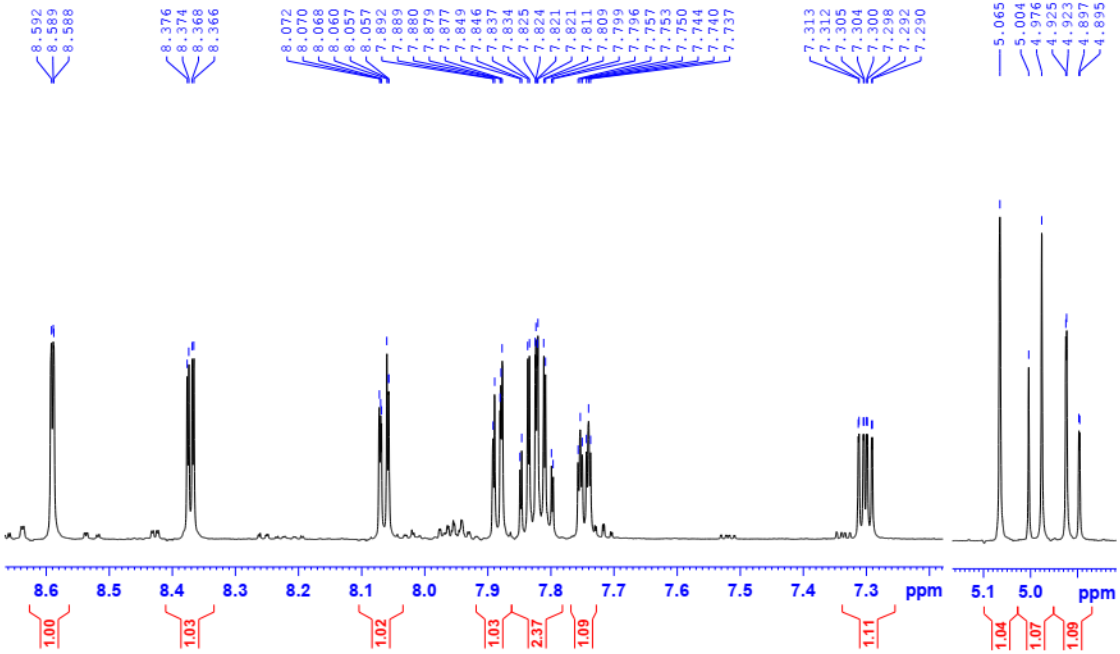

HP245.05-DMSO-C13CPD

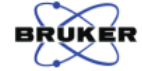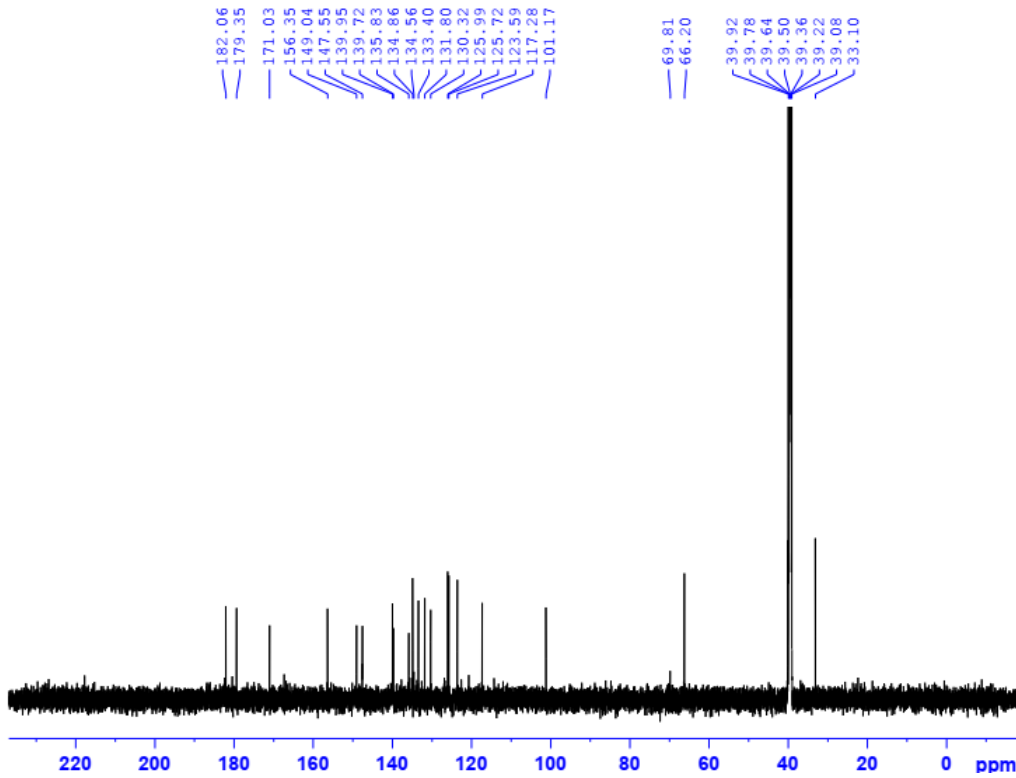

```

Current Data Parameters
NAME      6HP245.05
EXPNO    2
PROCNO   1

F2 - Acquisition Parameters
Date_    20220408
Time     20.23 h
INSTRUM  Avance NEO 600MHz
PROBHD   zgpg30
PULPROG  zgpg30
TD       65536
SOLVENT  DMSO
NS       2072
DS       4
SWH      38461.539 Hz
FIDRES   1.173783 Hz
AQ       0.8519680 sec
RG       101
DN       13.000 usec
DE       8.50 usec
TE       302.6 K
D1       2.00000000 sec
D11      0.03000000 sec
TDO      1
SFO1     150.9873069 MHz
NUC1     13C
PC       5.22 usec
P1       16.00 usec
PLW1     113.90000153 W
SFO2     600.4024016 MHz
NUC2     1H
CPDPRG2  waltz165
PCPD2    70.00 usec
PLW2     13.36600018 W
PLW12    0.18792000 W
PLW13    0.09452000 W

F2 - Processing parameters
SI       32768
SF       150.9707760 MHz
WDW      EM
SSB      0
GB       0
PC       1.40
    
```

HP245.05-DMSO-C13CPD

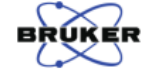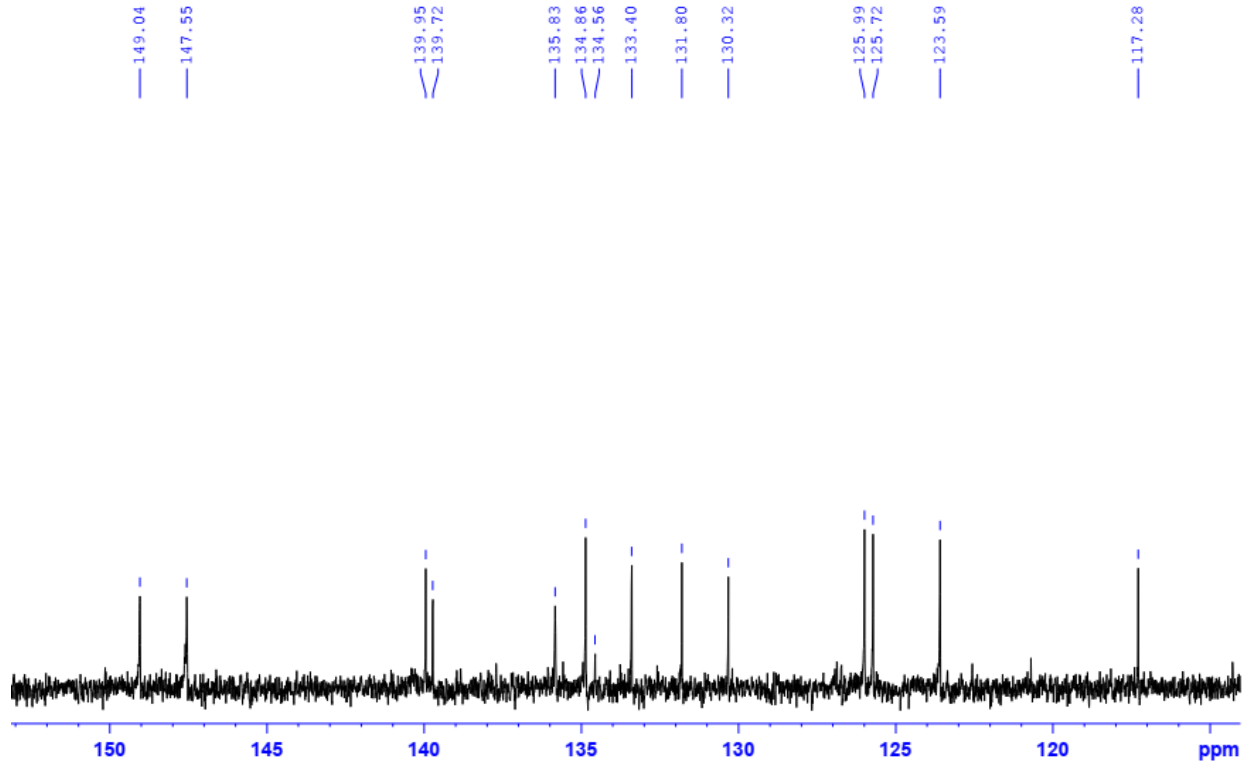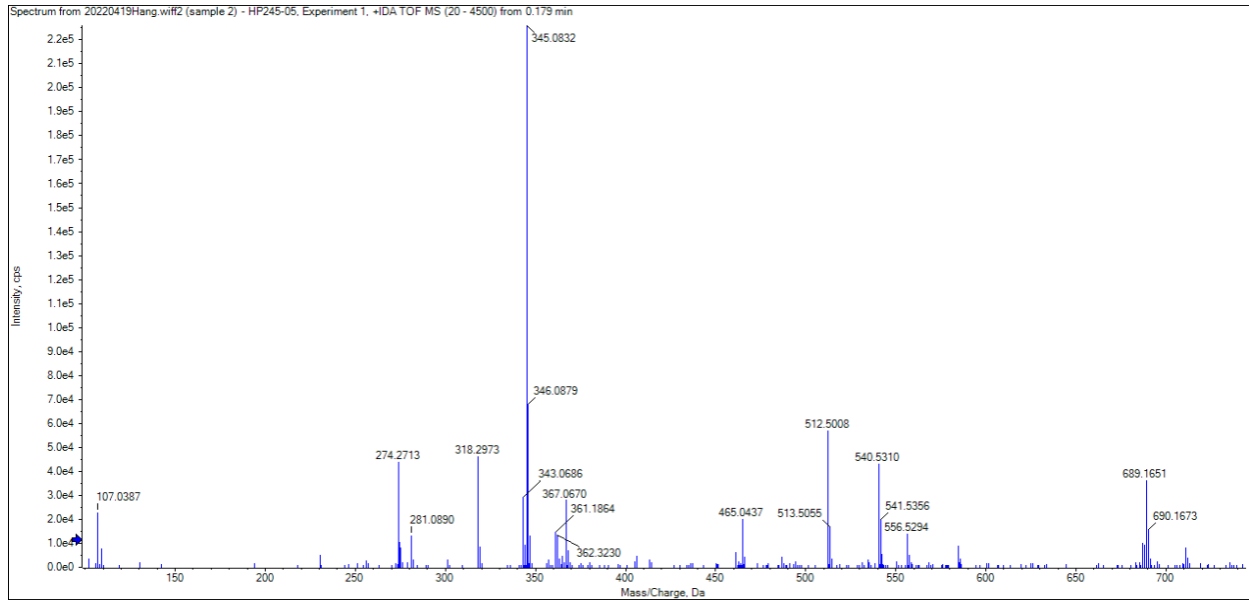

11-(5-Bromopyridin-2-yl)-4,11-dihydrobenzo[g]furo[3,4-b]quinoline-1,5,10(3H)-trione (5o).

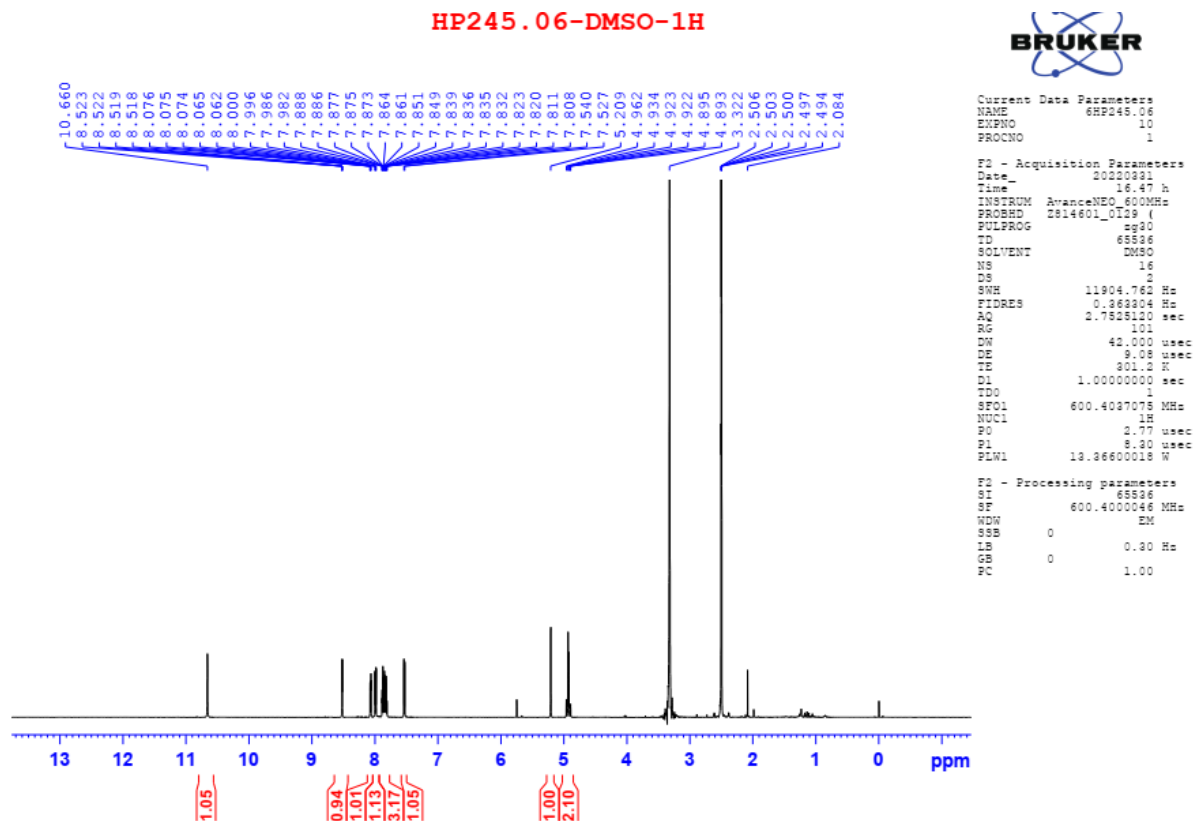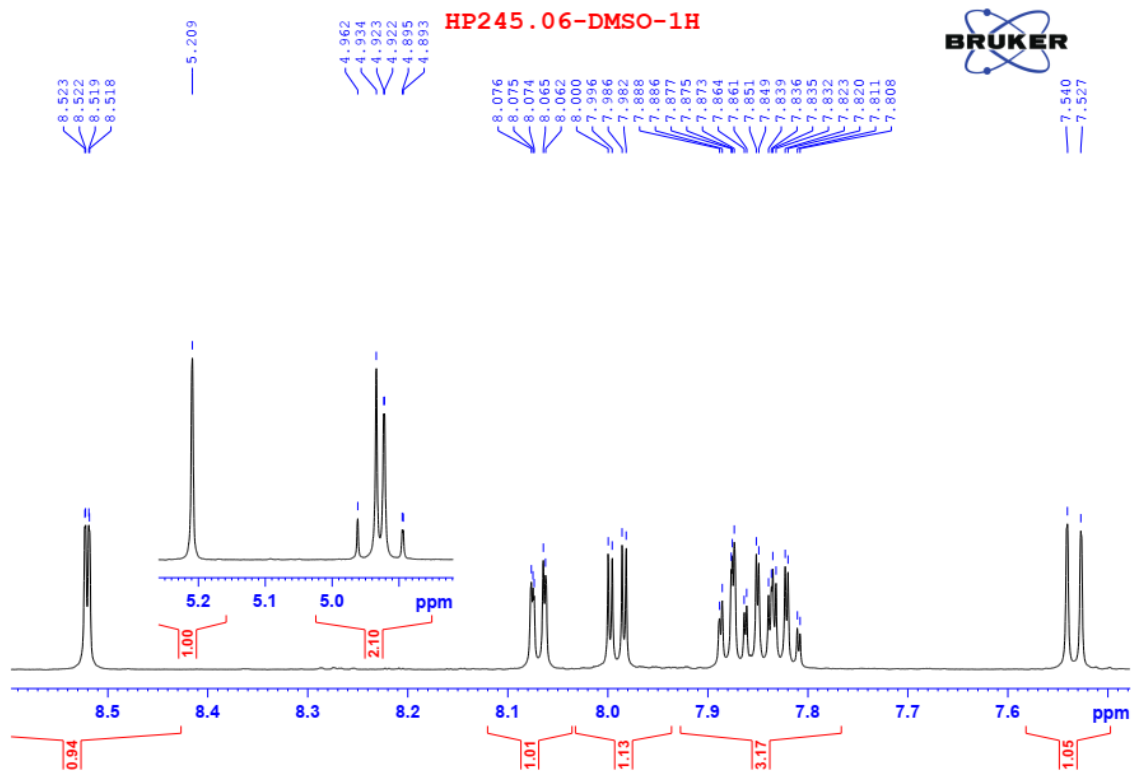



HP245.06-DMSO-C13CPD

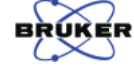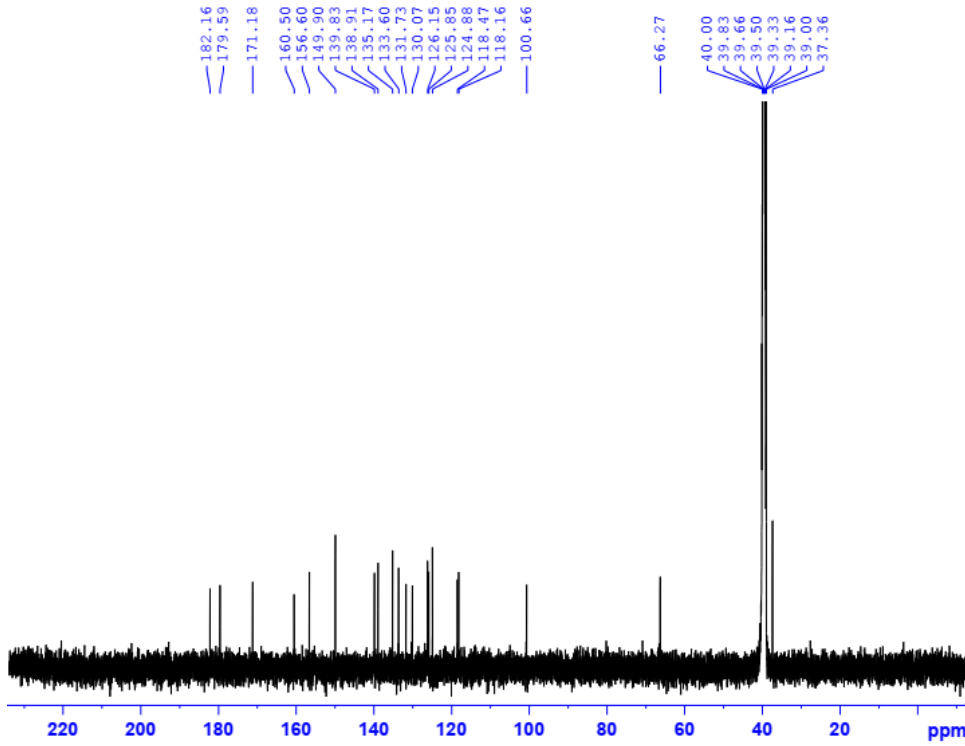

Current Data Parameters  
 NAME HP245.06  
 EXPNO 2  
 PROCNO 1

F2 - Acquisition Parameters  
 Date\_ 20220404  
 Time 19.18  
 INSTRUM spect  
 PROBHD 5 mm PABBO BB/  
 PULPROG zgpg30  
 TD 65536  
 NS 2048  
 DS 4  
 SWH 31250.000 Hz  
 FIDRES 0.476837 Hz  
 AQ 1.0483760 sec  
 RG 198.87  
 DW 16.000 usec  
 DE 6.50 usec  
 TE 300.2 K  
 D1 2.00000000 sec  
 D11 0.02000000 sec  
 TDO 1

===== CHANNEL f1 =====  
 SF01 125.7990220 MHz  
 NUCL1 13C  
 P1 10.00 usec  
 PLW1 88.00000000 W

===== CHANNEL f2 =====  
 SF02 500.2410010 MHz  
 NUCL2 1H  
 CPDPRG12 waltz16  
 P2P21 80.00 usec  
 PLM2 22.00000000 W  
 PLM12 0.38764000 W  
 PLM13 0.17989001 W

F2 - Processing parameters  
 SI 32768  
 SF 125.7852323 MHz  
 NDM EM  
 SSB 0  
 GB 1.00 Hz  
 PC 1.40

HP245.06-DMSO-C13CPD

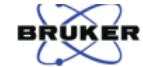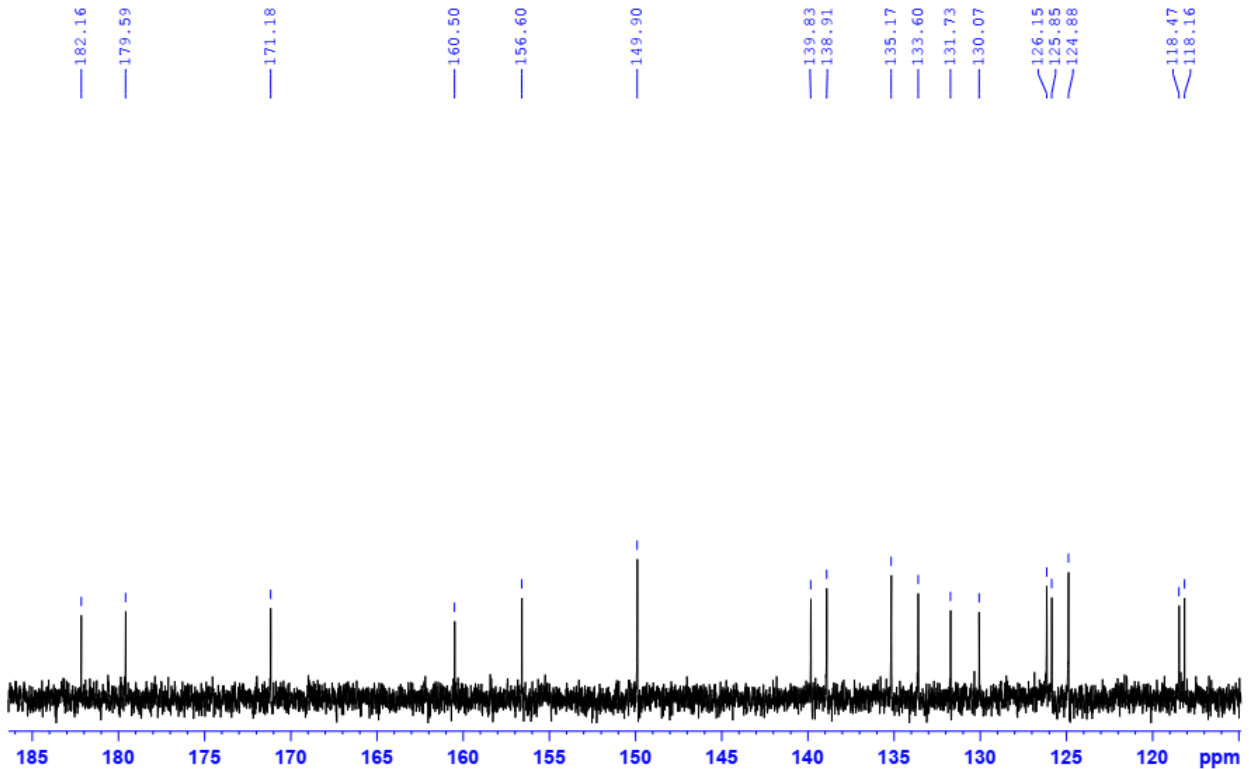

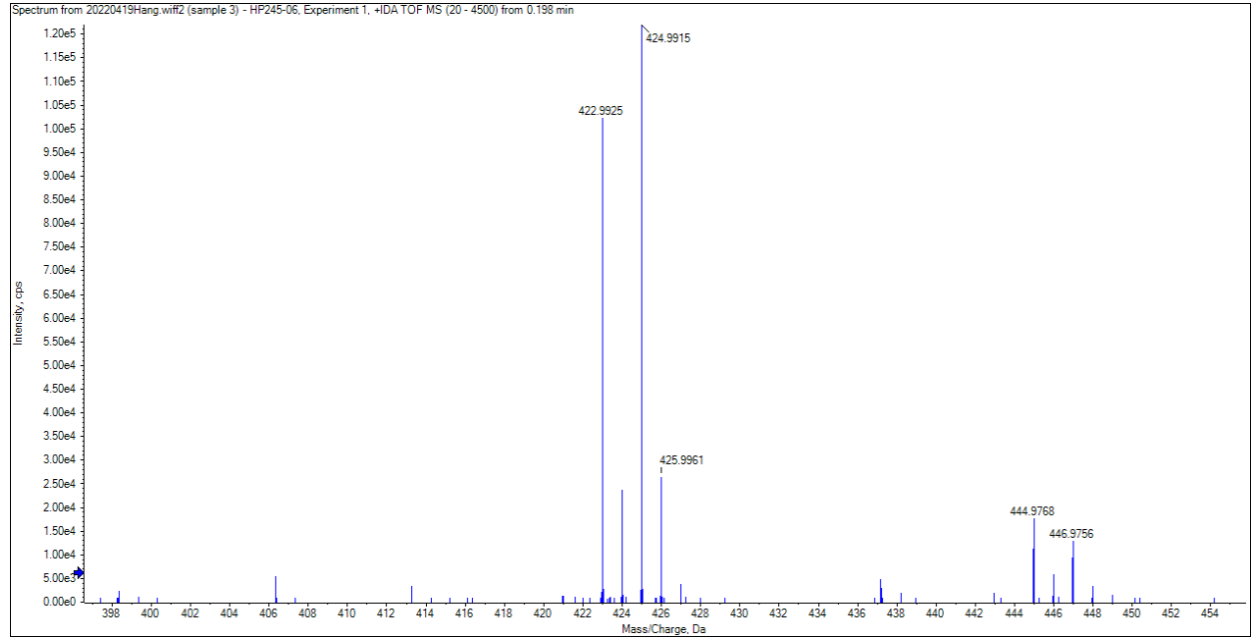

Supplement: d2ra03312g1.pdf [file d2ra03312g1.pdf]
